1 **Peer Review Information:** *Communications Biology* thanks Francesco  
2 Tamagnini and the other, anonymous, reviewers for their contribution to  
3 the peer review of this work. Primary Handling Editors: Christian Wozny  
4 and George Inglis. Peer reviewer reports are available.

## 6 **Truncating Tau Reveals Different Pathophysiological** 7 **Actions of Oligomers in Single Neurons**

8  
9 **Emily Hill<sup>1\*</sup>, Thomas K. Karikari<sup>2</sup>, Juan Lantero-Rodriguez<sup>2</sup>, Henrik Zetterberg<sup>2,3,4,5</sup>, Kaj**  
10 **Blennow<sup>2,3</sup>, Magnus J Richardson<sup>6</sup>, Mark J Wall<sup>1\*</sup>**

11 <sup>1</sup>School of Life Sciences, University of Warwick, Coventry CV4 7AL, United Kingdom

12 <sup>2</sup>Department of Psychiatry and Neurochemistry, Institute of Neuroscience and Physiology, University  
13 of Gothenburg, SE-43180 Mölndal, Sweden.

14 <sup>3</sup>Clinical Neurochemistry Laboratory, Sahlgrenska University Hospital, SE-43180 Mölndal, Sweden.

15 <sup>4</sup>UK Dementia Research Institute at UCL, London WC1E 6BT, United Kingdom

16 <sup>5</sup>Department of Neurodegenerative Disease, UCL Institute of Neurology, London WC1E 6BT, United  
17 Kingdom

18 <sup>6</sup>Institute of Mathematics, University of Warwick, Coventry CV4 7AL, United Kingdom

19  
20 \*Authors for correspondence: Emily Hill [E.hill.2@warwick.ac.uk](mailto:E.hill.2@warwick.ac.uk) and Mark Wall

21 [Mark.wall@warwick.ac.uk](mailto:Mark.wall@warwick.ac.uk)

### 23 **Abstract**

24 Tau protein is involved in maintaining neuronal structure. In Alzheimer's disease, small numbers of  
25 tau molecules can aggregate to forms oligomers. However, how these oligomers produce changes in  
26 neuronal function remains unclear. Previously, oligomers made from full-length human tau were found  
27 to have multiple effects on neuronal properties. Here we have cut the tau molecule into two parts: the  
28 first 123 amino acids and the remaining 124-441 amino acids. These truncated tau molecules had  
29 specific effects on neuronal properties, allowing us to assign the actions of full-length tau to different  
30 regions of the molecule. We identified one key target for the effects of tau, the voltage gated sodium  
31 channel, which could account for the effects of tau on the action potential. By truncating the tau  
32 molecule, we have probed the mechanisms that underlie tau dysfunction, and this increased  
33 understanding of tau's pathological actions, will build towards developing future tau-targeting  
34 therapies.

35

36

37

38

39

## 40 **Introduction**

41 Tau is a microtubule-associated protein which can modify neuronal morphology, vesicle transport and  
42 trafficking (1,2). Tau dysfunction contributes to diseases, termed tauopathies, either as the primary  
43 causative agent (e.g., Pick's disease) or as a component of the neuropathology (e.g., Alzheimer's  
44 disease, AD). Tauopathies have varying histopathological and clinical presentations and are often  
45 distinguished by the ultrastructure of the tau aggregates (3,4). In AD, abnormally phosphorylated tau  
46 dissociates from microtubules and aggregates to form oligomers and fibrils, accumulating in the  
47 soma-dendritic compartment (5). Tau can further aggregate to form neurofibrillary tangles (NFTs),  
48 whose abundance correlates with disease progression (6,7). However, it appears that the soluble tau  
49 oligomers (oTau) are the most bioactive, in terms of disrupting neuronal function. Indeed, the toxic  
50 effects of tau oligomers can occur in the absence of NFT pathology (8–10). Although the toxicity of  
51 oTau is now well established, the mechanistic basis of oTau actions on neuronal function are poorly  
52 understood.

53 Electrophysiological studies have revealed several pathological mechanisms for the actions of full  
54 length (FL) oTau, including alterations in neuronal excitability and short- and long-term synaptic  
55 plasticity (11–14). Viral introduction and transgenic models are commonly used to explore the roles of  
56 oTau in pathology (8–10). While these methods generate valuable data, they provide little information  
57 on the concentration and structural conformations of oTau that are responsible for the neurotoxic  
58 effects. For other approaches, such as the extracellular application of oTau to tissue or cell cultures  
59 (15–17), cellular uptake may be the limiting step, reducing the observed toxicity. Moreover, it is not  
60 possible to target oligomers to either pre- or post-synaptic neurons and homeostatic adaptation may  
61 occur.

62 To address these limitations, whole-cell patch-clamp recording has recently been used to introduce  
63 oTau into single neurons and has enabled specific targeting to either pre- or post-synaptic cells  
64 (11,18). This approach only requires small amounts of oligomers, each cell acts as its own control and  
65 electrophysiological alterations can be observed in real time. Furthermore, direct comparisons can be  
66 made between different concentrations and structural conformations of the oTau introduced  
67 (11,19,20).

68 Previously, full-length (FL, prepared from full-length human tau 1-441) oTau (44-444 nM) was shown  
69 to modify the excitability (as measured by a change in firing rate), input resistance and action potential

70 waveform of CA1 pyramidal neurons (11). We hypothesized that specific truncations of the tau  
71 molecule may allow these various effects to be dissected apart, identifying the underlying  
72 mechanisms and which parts of the molecule cause which effect. We therefore created truncated  
73 versions of tau informed by a physiologically relevant truncation at amino acid 123 that was recently  
74 discovered in AD patients (21). We used oligomers formed from tau lacking the N-terminal region (aa  
75 124-444; C<sup>FRAG</sup>) and soluble aggregates of the non-oligomer forming N-terminal fragment (aa 1-123;  
76 N<sup>FRAG</sup>). Using these tau constructs, we have identified specific mechanisms underlying the changes to  
77 excitability (firing rate), whole-cell conductance and action potential waveform.

## 78 **Results**

### 79 **Structural characterisation of the tau samples**

80 A validated method was used to generate non-fibrillar soluble tau aggregates without the use of  
81 aggregation-inducing factors such as heparin (11,22,23) Incubating all three tau samples at room  
82 temperature overnight led to the formation of small soluble aggregates (FL oligomers, C<sup>FRAG</sup>  
83 oligomers, N<sup>FRAG</sup> soluble aggregates; Figure 1A), as shown by negative-stain transmission electron  
84 microscopy (TEM) for both truncations and the full-length version of tau. However, there are likely to  
85 be structural differences in the aggregate conformers; C<sup>FRAG</sup>-tau is more likely to form granular  
86 shaped oligomeric aggregates similar to those of FL-oTau (Figure 1B and 11; 21, 22). Conversely,  
87 N<sup>FRAG</sup>-tau is more likely to form more amorphous, irregular-shaped, non-amyloidogenic aggregates, in  
88 agreement with (24). For each variant, monomeric controls (incubated for the same duration but at 4  
89 °C) did not form aggregates (Figure 1B).

90

### 91 **Removing the N-terminal region of tau (aa 1-123) abolishes the effects of tau on action 92 potential waveform and input resistance, but the increase in firing rate remains.**

93 We first compared the effects of C<sup>FRAG</sup>-oTau (aa124-444) to FL-oTau (with vehicle as control). There  
94 was no significant difference in the electrophysiological parameters of the recorded neurons  
95 measured at time 0 (whole-cell breakthrough) between all 3 of the experimental conditions. Therefore,  
96 the initial quality of recordings and neuronal properties were comparable. In control neurons, there  
97 were no significant changes to any of the measured parameters across the duration of recordings (40  
98 minutes, Figure 2; Table 1). There were also no changes to the resting membrane potential for any of  
99 the experimental conditions across the duration of recordings (Figure 2A, B; Table 1). FL-oTau had  
100 comparable effects to those previously reported in (11): increasing input resistance, increasing  
101 neuronal firing rate (a correlate of neuronal excitability) and changing the action potential waveform  
102 (reducing height, amplitude relative to baseline, and increasing width). These effects were specific to  
103 oligomers, with monomeric FL-oTau having no significant effects (11) and are not the result of the tau  
104 oligomers blocking the tip of the recording pipette, as a number of controls have previously been  
105 carried out to eliminate this possibility (11,19,20).

106

107 The increase in firing rate induced by FL-oTau, was previously assumed to be the result of the  
108 increase in input resistance (Figure 2C, D, E) as less current will be required to produce the same

109 voltage change. However, although  $C^{\text{FRAG}}$ -oTau had no significant effect on input resistance (Figure  
110 2C), it still significantly increased the firing rate (induced by current injection) suggesting that the  
111 effects on firing rate can occur independently of changes in input resistance (Figure 2C-E). In contrast  
112 to FL-oTau, which in agreement with (11), significantly increased action potential width and decreased  
113 action potential height, introduction of  $C^{\text{FRAG}}$ -oTau had no significant effects on the action potential  
114 waveform (Figure 2D-G). Thus, loss of the first 123 amino acids from tau removes the effects on input  
115 resistance and action potential waveform. These effects could either be a direct effect of the N-  
116 terminal sequence or could result from a change in the structural conformation of the oligomers, which  
117 could differ following truncation.

### 118 **A reduction in the rheobase current induced by $C^{\text{FRAG}}$ -oTau is consistent with its effects on** 119 **firing rate.**

120 To evaluate the effects on neuronal excitability in more detail, we examined the rheobase (the  
121 minimal current required to elicit an action potential). The rheobase was measured by injecting a  
122 current ramp (see methods). There was no significant difference in the rheobase in control (vehicle)  
123 vs FL or  $C^{\text{FRAG}}$ -oTau injected neurons at time 0 (Table 1, Figure 3). In control neurons, there was no  
124 significant difference in the rheobase current over the duration of the recording. However, when either  
125 FL or  $C^{\text{FRAG}}$ -oTau were introduced, the rheobase was significantly reduced (Table 1, Figure 3). This  
126 is consistent with the observed increase in firing rate in response to fluctuating noisy current injection  
127 (Figure 2F, G).

128

### 129 **$C^{\text{FRAG}}$ tau oligomers reduce the current needed to elicit APs**

130 We hypothesized that the decrease in rheobase current might be due to a smaller difference between  
131 the resting membrane potential and spike initiation threshold (value of membrane potential that needs  
132 to be surpassed to fire an action potential). Since there is no change in resting membrane potential,  
133 this could only occur if there was a hyperpolarising shift in spike initiation threshold. The dynamic IV  
134 method (25–27) provides a protocol to accurately parameterise neurons including spike initiation  
135 threshold (see methods). In (11), it was not possible to map changes in neuronal parameters over  
136 time using the dynamic IV method, as it is not very effective if there are significant changes in the  
137 action potential waveform. However, as  $C^{\text{FRAG}}$ -oTau has no effect on the action potential waveform, it  
138 is possible to use this method to measure spike initiation threshold. There was no significant  
139 difference between the spike initiation threshold in control neurons (vehicle) vs neurons receiving in  
140  $C^{\text{FRAG}}$ -oTau at 0 mins. In control neurons, there was no significant difference in spike initiation  
141 threshold after 40 minutes (recording duration), whereas for neurons where  $C^{\text{FRAG}}$ -oTau was  
142 introduced, spike initiation threshold was significantly hyperpolarised. Although the reduction in spike  
143 initiation threshold was only ~4 mV, across a network this would cause a large shift in excitability. We  
144 also noted an increase in spike onset sharpness, which is a measure of how narrow the voltage range  
145 within which a spike starts to initiate, as well as how sharply the spike begins to rise (sharper DIV  
146 curve). In control neurons, there was no significant difference in spike onset over the duration of the  
147 recording, whereas for neurons where  $C^{\text{FRAG}}$ -oTau was introduced, the onset was increased (steeper,  
148 reflecting increased excitability). It can be noted that though the spike-onset range was broader at 40

149 mins, this change (unlike for the spike threshold parameter  $V_T$ ) had no significant effect on the firing  
150 rate (see Figure 4D).

151

152  **$N^{\text{FRAG}}$ -tau aggregates generate a rapid increase in input resistance and change action potential  
153 waveform.**

154 As  $C^{\text{FRAG}}$ -oTau did not replicate the changes to input resistance and action potential waveform  
155 observed with FL oTau, we next introduced  $N^{\text{FRAG}}$ -tau (aa1-123) and measured changes in neuronal  
156 parameters to determine if this fragment of tau could produce these effects. Unexpectedly, in  
157 preliminary experiments we observed a large increase in input resistance induced by  $N^{\text{FRAG}}$ -tau within  
158 the first 5 minutes of recording (Figure 5A). This effect occurred without a change in the bridge  
159 balance confirming that the tau fragment is not blocking the patch pipette tip (Supplementary Figure  
160 8). It has previously been shown that FL-oTau neither aggregates in the end of the pipette tip nor  
161 impedes voltage measurements through re-patching experiments (11). However, this rapid change  
162 could be due to  $N^{\text{FRAG}}$ -tau forming aggregates close to the introduction site in the soma and reducing  
163 the apparent electrotonic size of the soma. By fitting the voltage step (exponential) we extracted the  
164 time constant and used this to calculate cellular capacitance using the following equation:

165

$$\text{Time constant } (T) = \text{Input resistance } (R_{in}) \times \text{Capacitance } (C) \quad \text{Eq. 1}$$

166

167 By 5 mins, the time constant was significantly reduced, reflecting a change in whole-cell capacitance.  
168 To test the possibility that this rapid change to whole-cell resistance and capacitance could be due to  
169 the aggregation of the  $N^{\text{FRAG}}$ -tau in the soma impeding current flow, we performed a subset of  
170 experiments where two simultaneous whole-cell patch clamp recordings were made from the soma of  
171 the same CA1 pyramidal neuron (Figure 5 B-F, see methods). We injected current only via pipette 1  
172 and then measured the ratio of the voltage responses in pipette 1 and pipette 2 (voltage pipette 2/  
173 voltage pipette 1) (Figure 5C). We hypothesised that if  $N^{\text{FRAG}}$ -tau was injected via pipette 1, there will  
174 be an increase in the whole cell resistance, less current will leak out from the neuron and thus the  
175 voltage response measured from both pipettes will be increased without a change in the ratio. If  
176 however the  $N^{\text{FRAG}}$ -tau aggregates in the soma and interferes with the current flow between the  
177 pipettes then the ratio of the voltage response between the pipettes will be reduced as less current  
178 will reach pipette 2.

179

180 A 200 pA (1s) hyperpolarising step was only injected via pipette (1.) and voltage responses were  
181 measured from both pipettes (Figure 5C, pipettes 1. and 2.). As the current needs to travel from  
182 pipette 1 to pipette 2, the voltage response was always slightly smaller in pipette 2 than in pipette 1. In  
183 cells where both pipettes contained vehicle, there was no change in the relative amplitude of the  
184 voltage responses between 0 mins (whole-cell breakthrough) and 5 mins (Figure 5D). However, when  
185  $N^{\text{FRAG}}$ -oTau was introduced via pipette 1, there was a large increase in the voltage response  
186 measured by pipette 1 as a result of the increase in cell resistance (Figure 5E) . However, this was  
187 not reflected by an increase in the amplitude of the voltage step measured by pipette 2 (Figure 5E, F).

188 Thus, the ratio of voltage pipette 2/ voltage pipette 1) was significantly reduced (Figure 5E, F). This  
189 result is consistent with N<sup>FRAG</sup>-tau accumulating in the soma, impeding the flow of current between  
190 the two pipettes, resulting in an 'increase in the apparent input resistance and a decrease in the  
191 observed capacitance due to the cell appearing electronically smaller.

192

### 193 **N<sup>FRAG</sup> Tau-mediated changes to action-potential waveform are independent of aggregation** 194 **state**

195 We have demonstrated that the FL-oTau mediated increase in input resistance and changes to the  
196 action potential waveform occurred at later time points than we observed with N<sup>FRAG</sup>-tau. This may be  
197 because the FL o-Tau does not aggregate as rapidly as N<sup>FRAG</sup>-tau and thus takes longer to have its  
198 effects. To examine the effects of N<sup>FRAG</sup>-tau in more detail we used a lower concentration (133 nM)  
199 which may mimic the slower effects of FL-oTau. There were no effects of 133 nM N<sup>FRAG</sup>-tau on resting  
200 membrane potential, input resistance, firing rate or the rheobase current (Figures 6A-D). However,  
201 there were significant changes to the action potential waveform (increased width and decreased  
202 height, Figures 6E-G). These changes were similar to that observed with FL-oTau in this study and in  
203 (11). This was unexpected as the N-terminal fragment would be predicted to form structurally different  
204 aggregates to those formed by FL tau oligomers. We repeated the experiments with the monomeric  
205 version of N<sup>FRAG</sup>-tau and found no changes in resting membrane potential, input resistance, firing rate  
206 or rheobase current (Figure 6A-D). However, a comparable change to the action potential waveform  
207 was observed to the aggregated form of the fragment (Figure 6E-G). Given that the oTau-induced  
208 changes to action potential waveform that occur with full length tau (11) also occurred with the N-  
209 terminal fragment (N<sup>FRAG</sup>-Tau), both as a monomer and as an oligomer, it is likely that there is a  
210 sequence within the 1-123 amino acid region that directly interacts with a cellular component, rather  
211 than being an effect of the quaternary structure of the aggregates.

212

### 213 **FL-oTau alters somatic voltage gated sodium channel half activation and slows the rate of** 214 **activation**

215 Having demonstrated changes to the action potential waveform and a hyperpolarising shift in spike  
216 threshold, making the neurons more excitable, we next investigated whether these changes were  
217 mediated by interactions of tau with voltage gated sodium channels. FL-oTau (444 nM) was used in  
218 these experiments to evaluate whether both or either of its observed effects (on action potential  
219 waveform and firing rate) could be a result of an interaction with sodium (NaV) channels. FL-oTau  
220 was compared against control (vehicle). Recording sodium channel currents in hippocampal neurons  
221 in acute brain slices is challenging due to problems with space clamp, given the size of the neurons  
222 and the large amplitude and speed of the currents. One way to effectively clamp the currents, is to  
223 electronically isolate the soma. We followed the protocol outlined in (28), using a short depolarising  
224 pre-pulse to inactivate the axonal sodium channels, leaving only the somatic channels to be activated  
225 (see methods). It was then possible to achieve reasonable voltage clamp (Figure 7A). Normalised  
226 conductance's were plotted against voltage and fitted with a Boltzmann function. The fit (Figure 7B, C)  
227 was used to extract the half activation voltage and the rate constant of activation (indicative of the rate

228 of rise in conductance relative to change in voltage). The half activation was stable in control  
229 recordings, whereas in neurons that had FL-oTau 444 nM introduced, by 20 minutes the half  
230 activation had shifted significantly in a negative direction to activate ~ 4mV earlier, reflective of an  
231 increase in excitability (Figure 7). This could account for the change in spike threshold that was  
232 observed with C<sup>FRAG</sup> oTau. We also extracted the rate constant of activation; a smaller rate constant  
233 would indicate a steeper relationship between conductance and voltage. The rate constant of  
234 activation was stable in control, whereas in neurons that had FL-oTau introduced, by 20 minutes it  
235 had increased significantly (shallower slope, reflective of a flatter relationship to voltage). This change  
236 could explain the slowing of the action potential rising phase observed in (11) and in this study.

237

238 We then implemented a simplified model of the neuronal action potential with general applicability  
239 (29) to evaluate whether the conductance changes mediated by FL-oTau could feasibly underly the  
240 changes we observed in action potential waveform. Our experimental voltage gated sodium current  
241 recordings showed that FL-oTau mediates a reduction of  $\bar{g}_{Na}$  to by two thirds of the value at 0  
242 minutes after 20 minutes (7F-I). Therefore, we first simulated an action potential with  $\bar{g}_{Na} =$   
243  $120 \text{ mS/cm}^2$  (28, Figure 7J, red) and then again with  $\bar{g}_{Na} = 40 \text{ mS/cm}^2$  (Figure 7J, red trace). We  
244 found that this reduction in maximal conductance matches the experimental phenotype well (in  
245 particular the changes in action potential amplitude and speed of rise to threshold; Figure 7K).

246

## 247 Discussion

248 In Alzheimer's disease (AD) and in other tauopathies, tau aggregates into small soluble toxic  
249 oligomers,

250 a process that precedes the formation of large insoluble aggregates (NFTs). In AD, NFTs and  
251 amyloid-

252  $\beta$  plaques are the characteristic hallmarks of the disease with post-mortem confirmation of both NFTs  
253 and plaques required for definitive diagnosis (6,7,30). Many studies have shown that the small soluble  
254 aggregates (oligomers) formed early in the aggregation pathway are much more bioactive than NFTs  
255 pathology (8–10). These findings have led to the targeting of oligomers to reduce tau cytotoxicity in  
256 disease models and in AD patients. However, the mechanisms of how these oligomers produce  
257 neuronal dysfunction are still not fully defined. Here, we have used specific truncations to dissect  
258 apart the actions of full length (FL) -oTau. We have used oligomers formed from N-terminal truncated  
259 tau (aa 124-444; C<sup>FRAG</sup>) and soluble aggregates of the non-oligomer forming N-terminal fragment (aa  
260 1-123; N<sup>FRAG</sup>).

261

262 It is conceivable that some of the changes in electrophysiological properties that we have observed  
263 could result from tau oligomers blocking the tip of the patch pipette and increasing series resistance.  
264 In particular the changes in action potential amplitude and waveform kinetics. In previous studies  
265 (11,19,20) and in this study we have carried out a number of control experiments that have allowed us  
266 to reject this possibility. These controls include monitoring of series resistance throughout recordings  
267 and adjusting the bridge balance as required, introducing large concentrations of a control protein

268 (BSA, 20  $\mu$ M vs 44-144 nM) into neurons and observing no change in series resistance, repatching  
269 neurons (with vehicle in the patch solution) which had been injected with tau oligomers and showing  
270 that the changes in action potential waveform persisted (11). We have subsequently checked that the  
271 open tip resistance of patch pipettes does not change over time (as a result of clogging with tau  
272 oligomers). In this study we have found that it is the smallest fragment of the tau oligomer that has  
273 the greatest effects on action waveform, which is the opposite to what would be expected if it was just  
274 the tau oligomers non-specifically blocking the pipette tip. We have also previously investigated the  
275 effects of alpha-synuclein oligomers on neuronal properties by introducing them via the patch pipette  
276 (19). These oligomers are much larger than the tau oligomers but had no effect on the action potential  
277 amplitude or waveform kinetics (19).

278

279 The N-terminal truncation ( $C^{\text{FRAG}}$ ) at position 123, has been identified as a major N-terminal cleavage  
280 site in tau found in human CSF (21) and a truncated tau construct at a nearby position has been used  
281 to study effects on synaptic transmission (31). We found that  $C^{\text{FRAG}}$ -oTau did not replicate the effects  
282 on action potential kinetics or input resistance that were observed with FL-oTau but did still increase  
283 firing rate. This firing rate increase is mediated by a reduction in the minimum current required to elicit  
284 an action potential. Using the dynamic IV protocol we found that  $C^{\text{FRAG}}$ -oTau reduces spike threshold  
285 by  $\sim$  4mV. Since there was no change in the resting membrane potential, the difference between  
286 spike threshold and resting potential was reduced, increasing the likelihood of firing. A  
287 hyperpolarisation of spike threshold ( $\sim$  3 mV) has also been previously reported in Tau35 transgenic  
288 mice (32). To confirm our observation further, the parameters extracted from the dynamic IV curve at  
289 0 minutes were used to simulate voltage responses using the exponential integrate and fire model  
290 (25–27,33). The control firing rate was comparable to experimental values. A reduction in the spike  
291 threshold by the experimentally observed reduction (4 mV), was sufficient to increase the firing rate to  
292 comparable experimental values with  $C^{\text{FRAG}}$  oTau. Thus, it is feasible for a change in spike threshold  
293 (without any change in input resistance) to mediate the observed changes in firing rate (a correlate of  
294 excitability) by  $C^{\text{FRAG}}$  oTau.

295

296 We then investigated the tau fragment that was removed to generate  $C^{\text{FRAG}}$  (aa 1-123;  $N^{\text{FRAG}}$ ). This  
297 fragment ( $N^{\text{FRAG}}$ ) makes up a large proportion of N-terminal tau species found in human CSF, and it  
298 could therefore represent a marker of tau metabolism (21).  $N^{\text{FRAG}}$  does form aggregates but these are  
299 likely to differ from the FL-oTau oligomers. When  $N^{\text{FRAG}}$  was introduced into neurons at equivalent  
300 concentrations to FL-oTau (444 nM), it produced a rapid increase in input resistance, reduced action  
301 potential amplitude and slowed action potential kinetics. These effects occurred within  $\sim$  5 minutes.  
302 Through measurements of the cell time constant we found that the apparent capacitance was  
303 significantly decreased. This led us to hypothesise that  $N^{\text{FRAG}}$  was interfering with current flow, making  
304 the neuron electrotonically smaller. By making simultaneous dual patch clamp recordings from the  
305 soma of a single neuron, we found that although input resistance was significantly increased, the  
306 current flow between the electrodes had significantly decreased. This is consistent with  $N^{\text{FRAG}}$  tau  
307 aggregating in the soma and impeding current flow across the cell.



308

309 Introducing N<sup>FRAG</sup> at lower concentrations (133 nM) changed action potential height and width without  
310 increasing input resistance or changing cell capacitance. Thus, the changes in action potential  
311 waveform were not simply due to increased filtering. Surprisingly, N<sup>FRAG</sup> monomers produced  
312 comparable changes to APs. Thus, the effects of N<sup>FRAG</sup> are unrelated to its quaternary structure and  
313 instead maybe associated with a specific sequence within N<sup>FRAG</sup> and FL-oTau. Given the nature of the  
314 changes in action potential waveform we hypothesised that tau might be interacting with voltage-  
315 gated sodium channels and altering their function.

316

317 Changes in action potential kinetics and amplitude can readily be measured using whole cell current  
318 clamp (29). However, recording the underlying sodium currents from neurons in slices using voltage  
319 clamp is challenging due to poor space clamp and the large amplitude and rapid rise of currents  
320 (34,35). A large proportion of sodium channels are clustered in the axon initial segment (AIS, 35–37),  
321 and their activation voltage can differ from that at the soma (37,39). Thus, these electrotonically  
322 remote sodium channels will generate unclamped currents, which prevent the measurement of  
323 controlled responses. To counteract this problem, many studies measurements of sodium channel  
324 currents are performed using dissociated or cultured neurons or in cell lines. However, these are less  
325 relevant physiologically relevant because the distribution, density and expression pattern of channels  
326 will be different from what is found in situ. An alternative approach is to use nucleated patches, which  
327 would provide a better voltage clamp, but the small volume of the patch may alter the amount of tau  
328 reaching the channels. It would therefore be difficult to accurately titrate the concentration of tau to  
329 make it compatible with the experiments done in whole cells. We have therefore adapted a protocol  
330 (28) to make controlled voltage clamp recordings in acute slices. A pre-pulse elicits an uncontrolled  
331 voltage response which activates axonal but not somatic sodium channels. As the axonal channels  
332 are inactivated, only the sodium channels in the soma contribute to the actual recorded current,  
333 allowing for finely controlled voltage clamp of the sodium currents. This protocol also required a  
334 number of other steps to produce clamp of isolated sodium channel currents including changing the  
335 Na<sup>+</sup> concentration inside and outside of the neuron, performing recordings at room temperature and  
336 replacing the calcium ions with cobalt to block voltage gated calcium channels (40). Those recordings  
337 in which Na<sup>+</sup> channels were not adequately clamped were readily identifiable and excluded from  
338 analysis (Supplementary Figure 7).

339

340 There are four subtypes of voltage-gated sodium channel present in the mammalian central nervous  
341 system, NaV 1.1,1.2,1.3,1.6 (41). At the AIS of CA1 pyramidal neurons, NaV1.1, NaV1.2, and NaV1.6  
342 channels have been identified (42–44). NaV1.6 is highly abundant and has a more hyperpolarized  
343 voltage of activation compared with the other sodium channel isoforms, contributing to the lower  
344 activation threshold (38). The sodium channels in the AIS probably contribute little to the clamped  
345 currents and this is a possible limitation of the technique. However, NaV1.6 is also expressed in the  
346 soma, 10 although at less abundance than at the AIS (45).

347

348 FL-oTau had three effects on sodium channel currents: Firstly, the half activation was reduced,  
349 reflecting the increase in neuronal excitability, consistent with the effects of C<sup>FRAG</sup>-oTau. Secondly,  
350 the rate of activation was reduced underlying the slower action potential rise, consistent with the  
351 effects of N<sup>FRAG</sup>-tau. Finally, FL-oTau reduced  $\bar{g}_{Na}$  (maximum sodium conductance) by ~ two thirds.  
352 To investigate the effects this would have on the AP, we implemented a simplified action potential  
353 model (29). Reducing  $\bar{g}_{Na}$  had effects that matched the experimental data (reduced action potential  
354 amplitude and change to threshold). Thus, this reduction in conductance could account for the  
355 changes that we observe experimentally.

356 From unnormalized conductance plots, we noticed that the rate of conductance increase appeared  
357 faster for FL-oTau despite  $\bar{g}_{Na}$  being reduced (Figure 7I). We therefore modelled the initial rise of the  
358 sodium current using the same approach (33) used to derive the original model:

359

$$360 \quad I_{Na} = (E_{Na} - E_{rest}) * g1 * e^{\left(\frac{V-V1}{\Delta T}\right)} \quad Eq. 2$$

361

362 Where  $g1$  is 1 nS and  $V1$  is the voltage where the conductance is 1 nS. For FL-oTau introduced cells,  
363  $\Delta T$  was calculated to be stable ~2.65 mV for 0 mins and 20 mins but  $V1$  varied over time. At 0 mins,  
364  $V1 = -32$  mV and by 20 mins,  $V1 = -36$  mV, demonstrating that a sodium conductance of 1 nS is  
365 achieved at a much lower voltage, thus the cell is more excitable (despite the peak sodium  
366 conductance being lower overall, Figure 7I). In the EIF model, the sodium current is modelled as:

367

$$\Delta T * gL * e^{\left(\frac{V-VT}{\Delta T}\right)} \quad Eq. 3$$

368

369 and comparing this with the equation for  $I_{Na}$  we get:

370

$$371 \quad VT = V1 + \Delta T * \log\left(gL * \frac{\Delta T}{g1} * (E_{Na} - E_{rest})\right) \quad Eq. 4$$

372

373 Empirically, the first term  $V1$  on the right-hand-side is dependent on parameters that change between  
374 0 mins and 40 mins, whereas the second term does not change significantly between these time  
375 steps. Hence the modelling predicts that the change in the action-potential threshold parameter  $V_T$  is  
376 largely due to changes in  $V1$  which is the voltage at which the sodium current is 1nS. The  $I_{Na}$   
377 experiments predict that the difference in  $VT$  at 0 and 40 mins is 4 mV, which fits exactly with the  
378 excitability phenotype modelled using C<sup>FRAG</sup>. Despite the differences in temperature for these  
379 recordings, these two independent methodologies further support that the tau-mediated shift in  
380 excitability comes from a lowering of the action-potential threshold (rather than input resistance  
381 changes) and that this change is mediated via a lowering of the sodium current activation. In future  
382 studies, it would be interesting to investigate the effects of tau oligomers on sodium channel  
383 inactivation. If the inactivation curve is negatively shifted by tau oligomers, this would increase the  
384 fraction of sodium channels inactivated at the resting membrane potential and this could also  
385 contribute to the reduction in maximal conductance.

386  
387 It is surprising to note that the difference in sodium conductance at 0 minutes and 20 minutes with FL-  
388 oTau is dependent on voltage, at low voltages the conductance is bigger at 20 mins in FL-oTau but at  
389 high voltages it is lower at 20 mins in o-Tau, thus, the effect is non-monotonic. Globally it appears that  
390 there is a lower maximal Na conductance at 20 mins (and therefore action potential height is  
391 reduced), but there is a small region at lower voltages where the conductance is higher for FL-oTau  
392 which means the model is more excitable. This means the profile of the  $I_{Na}$  activation has been  
393 changed by oTau; it is not just an issue of different maximal conductance magnitudes.

394  
395 The simplest explanation for these changes to sodium conductance is that a specific N<sup>FRAG</sup>-tau  
396 sequence binds to the sodium channel. The mammalian sodium channel is a molecular complex of an  
397 ~2000 amino acid  $\alpha$ -subunit, which contains the pore and drug interaction sites, and smaller  $\beta$ -  
398 subunits,  
399 which modulate membrane expression (46,47). The  $\alpha$ -subunit is divided into 4 domains each with 6  
400 segments (S1-S6). S1-4 form the voltage sensing domain (48) and S5-6 form the pore forming  
401 domain. Upon depolarisation, S6 segments move leading to channel opening via the P-loop between  
402 S5 and S6 which forms the channel pore (41,49). The S4 segments contain a high proportion of  
403 positively charged amino acid residues, making it responsive to changes in membrane potential (50).  
404 It is interesting to speculate on where the tau oligomers could bind to sodium channels, changing the  
405 coupling between depolarisation and pore opening. Many studies have shown that changes in the S4  
406 segments, associated linkers and cytoplasmic loops can all change the activation of the channels  
407 (41,49).

408  
409 This work has shown that by modifying the tau molecule it is possible to dissect apart the multiple  
410 effects it has on neuronal function (Table 2) and identify the molecular targets that tau might bind to.  
411 This not only provides information about the mechanisms of action of tau but also raises interesting  
412 possibilities. Since the truncations used in this study have been found in the CSF of AD patients, then  
413 the effects of tau will depend on the mixture of these molecules inside neurons. Thus, if tau is  
414 primarily present as the C<sup>FRAG</sup> then it will affect excitability and not change action potential waveform.  
415 However, if the N<sup>FRAG</sup> accumulates in the soma it will have large effects on neuronal integration and  
416 action potential waveform. It would also be interesting to identify whether these effects are specific to  
417 specific sodium channel isoforms, and therefore could effect some neurons more than others  
418 depending on the isoforms present.

419

## 420 **Methods**

### 421 **Recombinant production of FL and tau fragments**

422 Constructs: FL tau (amino acids 1-441 of tau 2N4R; Uniprot ID P10636-8), as well as the amino acids  
423 1-123 (C<sup>FRAG</sup>) and 124-441 (N<sup>FRAG</sup>) variants of this protein were recombinantly produced in *E. coli*.  
424 The different fragments were PCR amplified using custom designed primers representing the 5' and  
425 3' sequence respectively with Tau cDNA (RC213312, Origene) as template. The PCR fragment was

426 cloned directly into pET\_SUMO, a 6XHis tag and SUMO protein expression plasmid (Invitrogen), with  
427 a TA cloning site. Constructs were sequenced and transformed into E. coli BL21 (DE3) for  
428 expression.

429 SUMO fusion protein expression: E.coli BL21 (DE3) containing the sequence-confirmed plasmid  
430 constructs were incubated overnight in 20 ml Luria Bertani media with Kanamycin at a concentration  
431 of 50 µg/ml. The next morning, the turbid culture was used to inoculate 1L of Luria Bertani media with  
432 Kanamycin (50 µg/ml) at +37°C and when OD600 reached 0.5-0.7, protein expression was induced  
433 with 1.0 mM IPTG o/n at +26-28°C. BL21 (DE3) cells overexpressing tau forms were harvested by  
434 centrifugation at 7000 rpm for 20' at +4°C and the pellet stored at -20°C.

435 Purification: The pellet was resuspended in 5ml lysis buffer (20 mM Tris, 150 mM NaCl, 1% NP40 pH  
436 7.5, plus a tablet of protease inhibitor cocktail from Roche) per mg of cell pellet and incubated at room  
437 temperature for 30 min. The lysate was centrifuged for 20 min at 17,000×g, 4 °C and the supernatant  
438 collected. The protein extract was added to Ni-NTA agarose (Novex) equilibrated with 10 mM  
439 imidazole in 1x Native buffer and incubated with rotation at +4°C for 1h. Ni-NTA agarose was washed  
440 with 1x Native buffer + 20 mM imidazole and 6xHis-SUMO-tau fusion protein was eluted with 250 mM  
441 imidazole in 1x Native buffer. Purified fusion protein was dialysed against 50 mM Tris, 150 mM NaCl,  
442 pH 8.0 and protein concentration was determined with BCA.

443 SUMO-tau fusion protein (2 mg) was cleaved by +4°C overnight incubation in 50 µg SENP-1 SUMO  
444 protease in 50 mM Tris, 150 mM NaCl, 1 mM DTT. After cleavage, 6xHis-tag and His-tagged SUMO  
445 protease was bound to Ni-NTA agarose, the flowthrough containing tag-free tau was collected and  
446 any residual bound Tau protein was eluted with imidazole gradient, starting at 20 mM. Fractions  
447 containing Tau protein were collected and dialyzed against PBS. If needed, protein was concentrated  
448 using AmiconUltra4. Polishing of the tag-free tau protein variants to remove truncates and aggregates  
449 was performed by size exclusion chromatography (51). We used a Superdex S200 10/300 GL column  
450 (GE Healthcare) running on an Ethan LC system (GE Healthcare), with the running buffer being 1×  
451 PBS pH 7.4 (2x PBS for tau1-123). The following molecular weight markers from Sigma (#MWGF70-  
452 1KT) were used to estimate the elution volumes of the proteins of interest: blue dextran (2000 kDa;  
453 void volume), bovine serum albumin (66 kDa), carbonic anhydrase (29 kDa), cytochrome C (12.4  
454 kDa), and aprotinin (6.5 kDa). Each tau variant was purified in a two-step process; 1ml fractions from  
455 the first size exclusion chromatography were analysed by gel chromatography followed by Western  
456 blotting with specific tau antibodies to select high-protein fractions for further processing. Selected  
457 high-yield fractions were pooled and concentrated using ultrafiltration devices of appropriate  
458 molecular weight cut-offs from Amicon (51).

459

#### 460 **Preparing of tau oligomers**

461 To ensure the use of equal concentrations of the tau variants, molar concentrations were estimated  
462 using molecular weights specific to each tau construct sequence. Oligomers were prepared by  
463 overnight incubation of identical concentrations of each protein construct in 1X PBS at room

464 temperature without shaking, a method validated (22). Monomers were treated similarly but were  
465 incubated at 4 °C overnight. The samples were immediately dry-frozen by dipping into dry ice mixed  
466 with ethanol and stored at -80 °C until use. Oligomer concentrations were expressed in equivalence of  
467 starting monomer concentrations.

#### 468 **Transmission electron microscopy**

469 Formvar/carbon-coated 300-mesh copper grids (#S162, Agar Scientific) were glow-discharged using  
470 the ELMO system from Cordouan Technologies. Five microliters of labelled or unlabelled soluble tau  
471 aggregate preparations were pipetted onto the grid and allowed to bind for 1 min. Excess samples  
472 were removed with a strip of filter paper, and 5 µl of 2% uranyl acetate added for 1 min. After  
473 removing the excess stain with a strip of filter paper, the grids were imaged using a JEOL-2100F  
474 transmission electron microscope.

#### 475 **Electrophysiology**

##### 476 **Preparation of hippocampal brain slices**

477 All experiments were approved by the local Animals Welfare and Ethics Board (AWERB) at The  
478 University of Warwick. C57/BL6 male mice (3-4 weeks of age) were killed by cervical dislocation and  
479 decapitated in accordance with the United Kingdom Animals (Scientific Procedures) Act (1986).  
480 Parasagittal hippocampal slices (350 µM) were cut with a Microm HM 650V microslicer in cold (2–  
481 4°C) high Mg<sup>2+</sup>, low Ca<sup>2+</sup> aCSF (artificial CSF), composed of the following: 127 mM NaCl, 1.9 mM  
482 KCl, 8 mM MgCl<sub>2</sub>, 0.5 mM CaCl<sub>2</sub>, 1.2 mM KH<sub>2</sub>PO<sub>4</sub>, 26 mM NaHCO<sub>3</sub>, and 10 mM D-glucose (pH 7.4  
483 when bubbled with 95% O<sub>2</sub> and 5% CO<sub>2</sub>, 300 mOsm). Following preparation, slices were left to  
484 recover in recording aCSF (as above but with 1 mM MgCl<sub>2</sub> and 2 mM CaCl<sub>2</sub>) at 34°C. Slices were  
485 used within 1-8 hours after preparation.

##### 486 **Whole-cell patch clamp recording from pyramidal cells**

487 A slice was transferred to the recording chamber, submerged and perfused (2–3 ml/min<sup>-1</sup>) with aCSF  
488 at 30 °C. Slices were visualized using IR-DIC optics with an Olympus BX151W microscope  
489 (Scientifica) and a CCD camera (Hitachi). Whole-cell current-clamp recordings were made from  
490 pyramidal cells in area CA1 of the hippocampus using patch pipettes (5–10 MΩ) manufactured from  
491 thick-walled glass (Harvard Apparatus). Pyramidal cells were identified by their position in the slice,  
492 morphology (from fluorescence imaging) and characteristics of the standard current–voltage  
493 relationship. Voltage recordings were made using an Axon Multiclamp 700B amplifier (Molecular  
494 Devices) and digitized at 20 kHz. Data acquisition and analysis were performed using pClamp 10  
495 (Molecular Devices). Recordings from neurons that had a resting membrane potential of between –60  
496 and –75 mV at whole-cell breakthrough were accepted for analysis. The bridge balance was  
497 monitored throughout the experiments and any recordings where it changed by > 20 % were  
498 discarded. Soluble tau aggregates were added to intracellular solution containing the following: 135  
499 mM potassium gluconate, 7 mM NaCl, 10 mM HEPES, 0.5 mM EGTA, 10 mM phosphocreatine, 2  
500 mM MgATP and 0.3 mM NaGTP (293 mOsm, pH 7.2) to give a final concentration of 444 nM (20  
501 µg/ml tau) or 133 nM (6 µg/ml tau). These concentrations were chosen to align the study with

502 previously published findings (11). In control experiments, vehicle (PBS) was added instead of tau.  
503 Intracellular solution was always filtered before adding tau aggregates to avoid any loss of tau in the  
504 filter.

### 505 **Stimulation protocols**

506 To extract the electrophysiological properties of recorded neurons, both step, ramp and more  
507 naturalistic, fluctuating currents were injected at 10-min intervals for a duration of the recordings as in  
508 (11,19,20).

509

### 510 **Standard IV protocol**

511 The standard current–voltage relationship was constructed by injecting step currents from –200 pA  
512 incrementing by either 50 or 100 pA (1 s) until a regular firing pattern was induced. A plot of step  
513 current against voltage response around the resting potential was used to measure the input  
514 resistance (gradient of the fitted line).

515

### 516 **Rheobase ramp protocol**

517 To evaluate the rheobase (minimum current needed to elicit an action potential; AP) a current ramp  
518 was injected into neurons. From the baseline, a 100 ms ramp down by -50 pA, followed by a 900 ms  
519 ramp up by 150 pA, then a step back down to baseline.

520

### 521 **Dynamic IV protocol**

522 The dynamic IV curve, defined by the average transmembrane current as a function of voltage during  
523 naturalistic activity, can be used to efficiently parameterize neurons and generate reduced neural  
524 models that accurately mimic the cellular response (20,22,25–27). Briefly, a current wave form,  
525 designed to provoke naturalistic fluctuating voltages, was constructed using the summed numerical  
526 output of two Ornstein–Uhlenbeck processes (52) with time constants  $\tau_{fast} = 3$  ms and  $\tau_{slow} = 10$  ms.  
527 This current wave form, which mimics the background post-synaptic activity resulting from activation  
528 of AMPA and GABA<sub>A</sub> receptor channels, is injected into cells and the resulting voltage recorded (a  
529 fluctuating, naturalistic trace). The firing rate was measured from voltage traces evoked by injecting a  
530 current wave form of the same gain for all recordings (firing rate ~2–3 Hz). APs were detected by a  
531 manually set threshold and the interval between APs measured.

532 The dynamic transmembrane current ( $I_{ion}$ ) can be calculated using:

533

$$534 \quad I_{ion}(V, t) + I_{noise} = I_{inj}(t) - C \frac{dV}{dt} \quad Eq. 5$$

535

536 for which the injected current ( $I_{inj}$ ) is known, the derivative ( $dV/dt$ ) can be calculated from the  
537 experimentally measured voltage and the capacitance ( $C$ ) is attained from a minimum variance  
538 procedure (26). A scatter plot of the transmembrane current against voltage illustrates the dynamic  
539 relationship between the two, with the effects of weak background synaptic activity and other sources  
540 of high-frequency variability being accounted for as intrinsic noise ( $I_{noise}$ ) (26). Averaging the

541 transmembrane current in 1 mV bins removes the time dependence of  $I_{ion}(V,t)$  to yield the typical  
542 ionic current and a particular voltage, and thus defines the dynamic I-V curve ( $I_{dyn}$ ):

543

$$I_{dyn}(V) = Mean [I_{ion}(V, t)] \quad Eq. 6$$

544

545 It is well established that the exponential integrate-and-fire model (33) provides an excellent fit to the  
546 dynamic I-V curve (25–27). The exponential integrate-and-fire (EIF) model is characterized by a  
547 voltage forcing term  $F(V)$  that is related to the  $I_{dyn}$  as:

$$F(V) = \frac{-I_{dyn}(V)}{C} \quad Eq. 7$$

548

549 where the steady state forcing function  $F(V)$  for the EIF model is given as:

550

$$F(V) = \frac{1}{\tau} \left( E - V + \Delta_{\tau exp} \left( \frac{V - V_T}{\Delta_T} \right) \right) = -\frac{I_{dyn}(V)}{C} \quad Eq. 8$$

551 The dynamic curve fitted to the EIF model was used to extract four parameters: membrane time  
552 constant ( $\tau$ ), resting potential ( $E$ ), spike-initiation threshold ( $V_T$ ) and spike-onset sharpness ( $\Delta_T$ ), which  
553 describes the voltage range over which an action potential initiates (20,25–27). Dynamic I-V curves  
554 were constructed solely from the pre-spike voltage response (subthreshold and run up to spike) with  
555 all data falling within a 200 ms window after each spike being excluded from analysis.

### 556 **Sodium channel current recordings**

557 To record sodium channel currents in isolation, the intracellular and extracellular solutions used were  
558 modified from (28). The extracellular solution contained following (in mM): 124 NaCl, 25 NaHCO<sub>3</sub>, 3  
559 KCl, 1.5 CoCl<sub>2</sub>, 1.0 MgSO<sub>4</sub>, 0.5 NaH<sub>2</sub>PO<sub>4</sub>, and 30 D-glucose, equilibrated with 95% O<sub>2</sub> and 5% CO<sub>2</sub>  
560 (pH 7.4). Calcium chloride was replaced with cobalt chloride to block the voltage-gated calcium  
561 channel currents. Experiments were performed at room temperature (~ 22°C to improve the quality of  
562 the voltage clamp, (28). To reduce the amplitude of the sodium channel currents, 50 mM Na<sup>+</sup> was  
563 present in the intracellular solution: 70 Cs-gluconate, 30 Na-gluconate, 10 TEA-Cl, 5 4-AP, 10 EGTA,  
564 1 CaCl<sub>2</sub>, 10 HEPES, 4 Mg-ATP, 0.3 Na<sub>3</sub>-GTP, 10 Na<sub>2</sub>-phosphocreatine. Soluble full length tau  
565 aggregates were added to intracellular solution to give a final concentration of 444 nM (20 µg/ml tau)  
566 to align with the findings of this study and of (11).

567 Series resistance ( $R_s$ ) was measured throughout the recording and were typically in the range of 6-12  
568 MΩ. Cells with  $R_s$  over 15 MΩ or those that differed by more than 20 % over the period of recording  
569 were discarded.  $R_s$  was not compensated, but the liquid junction potential of ~ 8 mV was  
570 corrected. Leak currents were subtracted using the P/n protocol (1/4) and the resulting data  
571 displayed.

572 The stimulation protocol was adapted from (28) to allow fully clamped somatic Na<sup>+</sup> channel currents to  
573 be recorded. Neurons were held at -80 mV. A depolarising pre-pulse was given (5 ms, -40 mV) to  
574 activate axonal, but not somatic, sodium channels. This was followed by a 1 ms step to -55 mV and

575 then voltage steps (from -60 to 60 mV, 5 ms duration) were used to elicit controlled Na<sup>+</sup> channel  
576 current responses. The inter-sweep interval was 2 s. From the current responses, plots of current vs  
577 voltage or conductance vs voltage were calculated.

578

579 Conductance is given by the following equation:

$$\text{Conductance } (g) = \frac{I_{Na}}{V_{Step} - V_{Reversal}} \quad \text{Eq. 9}$$

580

581

582

583 The plot of conductance vs voltage was fitted with a Boltzmann equation:

$$y = \frac{A_1 - A_2}{1 + e^{(x-x_0)/dx}} + A_2 \quad \text{Eq. 10}$$

584 and then the half activation voltage and rate of activation constant were extracted and compared  
585 between control and oTau introduced neurons.

586

### 587 **Hodgkin Huxley action potential model**

588 The Hodgkin-Huxley (HH; 28) model is a simple but robust method for modelling the ionic  
589 conductance's that generate nerve APs. The HH model can be applied to study voltage gated sodium  
590 and potassium channels. It proposes that each sodium channel contains a set of 3 identical, rapidly  
591 responding, activation gates (the m-gates), and a single, slower-responding, inactivation gate (the h-  
592 gate) (29).

593

594 The membrane current is given by:

$$I = C_m \frac{dV_m}{dt} + g_K(V_m - V_K) + g_{Na}(V_m - V_{Na}) + g_l(V_m - V_l) \quad \text{Eq. 11}$$

595 Where  $I$  is the total membrane current and  $C_m$  is the membrane capacitance,  $g_K$ ,  $g_{Na}$  and  $g_l$  are the  
596 potassium, sodium and leak conductance's per unit area, and  $V_K$ ,  $V_{Na}$  and  $V_l$  are reversal potentials.

597

598 The sodium conductance can be given by:

$$I_{Na}(t) = \bar{g}_{Na} m(V_m)^3 h(V_m)(V_m - E_{Na}) \quad \text{Eq. 12}$$

599 Where  $\bar{g}_{Na}$  is the maximal sodium conductance and  $m$  and  $h$  are quantities between 0 and 1 that are  
600 associated with sodium channel activation and inactivation, respectively.  $V_m$  is the membrane  
601 potential and  $E_{Na}$  is the reversal potential for sodium.

602

603 Initial parameters were assigned as follows:  $\bar{g}_{Na}$ : 120 mS/cm<sup>2</sup>,  $\bar{g}_K$ : 36 mS/cm<sup>2</sup>,  $g_l$ : 0.3 mS/cm<sup>2</sup>,  
604  $C_m$ : 1 μF/cm<sup>2</sup>,  $V_m$ : -70 mV,  $E_{Na}$ : 60 mV,  $E_K$ : -88 mV,  $E_l$ : -54.4 mV in line with (29). All modelling  
605 was completed using either MATLAB or Julia software platforms (53).

606

### 607 **Statistics and reproducibility**



608 We have compared each of the aggregated tau truncations with FL-oTau and with control. We have  
609 illustrated the induced-changes to neuronal properties in the manuscript using normalised data  
610 (although all statistical analysis was carried out on the non-normalised data) as we are interested in  
611 the change over time (from 0 mins; whole-cell breakthrough). Data was normalized to time zero when  
612 the tau constructs will not have had time to diffuse into the recorded cell, this acts as an internal  
613 control. Therefore normalising the data to the values at whole-cell breakthrough makes it easier to  
614 observe any changes that occur over time and compare this between conditions.

615

616 Due to small sample sizes ( $n < 15$ ), statistical analysis was performed using non-parametric methods  
617 on the non-normalised data: Kruskal–Wallis analysis of variance (ANOVA), Mann Whitney and  
618 Wilcoxon signed-rank tests as required for non-parametric data. All data is represented as mean and  
619 standard error of the mean with individual experiments represented by single data points. No post-  
620 hoc corrections have been made following these comparisons. There is considerable controversy  
621 surrounding the arbitrariness and subjectivity that can be introduced into the presentation of the  
622 results by the number of post-hoc comparisons that could or could not be undertaken (54–56). We  
623 therefore prefer to present the results directly from the raw tests on a case-by-case basis. Each  
624 recorded cell is one data point. All experimental conditions were measured using multiple animals,  
625 only 1 cell was recorded per slice and recording conditions were interleaved to remove bias  
626 introduced from individual animals. Data points for each experimental condition were derived from a  
627 minimum of 4 individual animals.

628

629 A further direct comparison of all the tau constructs and control samples alongside one another is  
630 given in supplementary material. This is illustrated with both normalised and non-normalised data and  
631 a full statistical analysis of all of the conditions relative to one on other for each parameter  
632 (Supplementary Figures 1-6 and and Supplementary Tables 1-10).

633

#### 634 **Data availability**

635 Source data underlying main figures are presented in Supplementary Data 1. All other data that  
636 support the findings of this study are available within the article and its Supplementary Material or are  
637 available from the corresponding author upon reasonable request.

638

639

#### 640 **Acknowledgements:**

641 We would like to thank Irena Burman and Maria Olson for their contributions in helping to prepare the  
642 constructs. This work was supported by a Biotechnology and Biological Sciences Research Council-  
643 funded doctoral fellowship (E.H.). Part of this work was also supported by the Alzheimer's Research  
644 UK. E.H also holds a Race Against Dementia, Barbara Naylor Charitable Trust Fellowship. TKK holds  
645 a Brightfocus fellowship (#A2020812F), and was further supported by the Swedish Alzheimer  
646 Foundation (Alzheimerfonden), the Swedish Brain Foundation (Hjärnfonden), the Swedish Dementia  
647 Foundation (Demensförbundet), the Swedish Parkinson Foundation (Parkinsonfonden), Gamla

648 Tjänarinnor, the Aina (Ann) Wallströms and Mary-Ann Sjöbloms Foundation, the Gun and Bertil  
649 Stohnes foundation, and the Anna Lisa and Brother Björnsson's Foundation. HZ is a Wallenberg  
650 Scholar supported by grants from the Swedish Research Council (#2018-02532), the European  
651 Research Council (#681712), Swedish State Support for Clinical Research (#ALFGBG-720931), the  
652 Alzheimer Drug Discovery Foundation (ADDF), USA (#201809-2016862), the AD Strategic Fund and  
653 the Alzheimer's Association (#ADSF-21-831376-C, #ADSF-21-831381-C and #ADSF-21-831377-C),  
654 the Olav Thon Foundation, the Erling-Persson Family Foundation, Stiftelsen för Gamla Tjänarinnor,  
655 Hjärnfonden, Sweden (#FO2019-0228), the European Union's Horizon 2020 research and innovation  
656 programme under the Marie Skłodowska-Curie grant agreement No 860197 (MIRIADE), and the UK  
657 Dementia Research Institute at UCL. KB is supported by the Swedish Research Council (#2017-  
658 00915), the Alzheimer Drug Discovery Foundation (ADDF), USA (#RDAPB-201809-2016615), the  
659 Swedish Alzheimer Foundation (#AF-742881), Hjärnfonden, Sweden (#FO2017-0243), the Swedish  
660 state under the agreement between the Swedish government and the County Councils, the ALF-  
661 agreement (#ALFGBG-715986), the European Union Joint Program for Neurodegenerative Disorders  
662 (JPND2019-466-236), and the National Institute of Health (NIH), USA, (grant #1R01AG068398-01).

663

#### 664 **Author contributions:**

665 E.H., T.K.K and M.J.W. designed the research; T.K.K, J.LR, H.Z and K.B provided the recombinant  
666 tau samples. E.H. performed the research in the laboratory of M.J.W; E.H. and M.J.E.R. analysed  
667 data; E.H., T.K.K and M.J.W wrote the manuscript. J.L.R, H.Z, K.B and M.J.E.R provided edits and  
668 comments on the manuscript.

669

#### 670 **Competing interests:**

671 The authors declare no competing interests.

672

#### 673 **References**

674

- 675 1. Brandt R, Lee G. Functional organization of microtubule-associated protein tau. Identification  
676 of regions which affect microtubule growth, nucleation, and bundle formation in vitro. *J Biol*  
677 *Chem.* 1993 Feb 15;268(5):3414–9.
- 678 2. Tracy TE, Gan L. Tau-mediated synaptic and neuronal dysfunction in neurodegenerative  
679 disease. *Curr Opin Neurobiol.* 2018 Aug;51:134–8.
- 680 3. Dickson DW, Kouri N, Murray ME, Josephs KA. Neuropathology of frontotemporal lobar  
681 degeneration-tau (FTLD-tau). *J Mol Neurosci MN.* 2011 Nov;45(3):384–9.
- 682 4. Rademakers R, Neumann M, Mackenzie IR. Advances in understanding the molecular basis  
683 of frontotemporal dementia. *Nat Rev Neurol.* 2012 Aug;8(8):423–34.
- 684 5. Köpke E, Tung YC, Shaikh S, Alonso AC, Iqbal K, Grundke-Iqbal I. Microtubule-associated  
685 protein tau. Abnormal phosphorylation of a non-paired helical filament pool in Alzheimer  
686 disease. *J Biol Chem.* 1993 Nov 15;268(32):24374–84.
- 687 6. Avila J, Santa-María I, Pérez M, Hernández F, Moreno F. Tau phosphorylation, aggregation,  
688 and cell toxicity. *J Biomed Biotechnol.* 2006;2006(3):74539.

- 689 7. Maeda S, Sahara N, Saito Y, Murayama S, Ikai A, Takashima A. Increased levels of granular  
690 tau oligomers: an early sign of brain aging and Alzheimer's disease. *Neurosci Res.* 2006  
691 Mar;54(3):197–201.
- 692 8. Andorfer C, Kress Y, Espinoza M, de Silva R, Tucker KL, Barde Y-A, et al.  
693 Hyperphosphorylation and aggregation of tau in mice expressing normal human tau isoforms.  
694 *J Neurochem.* 2003 Aug;86(3):582–90.
- 695 9. Cowan CM, Chee F, Shepherd D, Mudher A. Disruption of neuronal function by soluble  
696 hyperphosphorylated tau in a *Drosophila* model of tauopathy. *Biochem Soc Trans.* 2010  
697 Apr;38(2):564–70.
- 698 10. Yoshiyama Y, Higuchi M, Zhang B, Huang S-M, Iwata N, Saido TC, et al. Synapse loss and  
699 microglial activation precede tangles in a P301S tauopathy mouse model. *Neuron.* 2007 Feb  
700 1;53(3):337–51.
- 701 11. Hill E, Karikari TK, Moffat KG, Richardson MJE, Wall MJ. Introduction of Tau Oligomers into  
702 Cortical Neurons Alters Action Potential Dynamics and Disrupts Synaptic Transmission and  
703 Plasticity. *eneuro.* 2019 Sep;6(5):ENEURO.0166-19.2019.
- 704 12. Hoover BR, Reed MN, Su J, Penrod RD, Kotilinek LA, Grant MK, et al. Tau mislocalization to  
705 dendritic spines mediates synaptic dysfunction independently of neurodegeneration. *Neuron.*  
706 2010 Dec 22;68(6):1067–81.
- 707 13. Mondragón-Rodríguez S, Salas-Gallardo A, González-Pereyra P, Macías M, Ordaz B, Peña-  
708 Ortega F, et al. Phosphorylation of Tau protein correlates with changes in hippocampal theta  
709 oscillations and reduces hippocampal excitability in Alzheimer's model. *J Biol Chem.* 2018  
710 Jun 1;293(22):8462–72.
- 711 14. Puzzo D, Piacentini R, Fà M, Gulisano W, Li Puma DD, Staniszewski A, et al. LTP and  
712 memory impairment caused by extracellular A $\beta$  and Tau oligomers is APP-dependent. *eLife.*  
713 2017 Jul 11;6.
- 714 15. Acquarone E, Argyrousi EK, van den Berg M, Gulisano W, Fà M, Staniszewski A, et al.  
715 Synaptic and memory dysfunction induced by tau oligomers is rescued by up-regulation of the  
716 nitric oxide cascade. *Mol Neurodegener.* 2019 Jun 27;14(1):26.
- 717 16. Fà M, Puzzo D, Piacentini R, Staniszewski A, Zhang H, Baltrons MA, et al. Extracellular Tau  
718 Oligomers Produce An Immediate Impairment of LTP and Memory. *Sci Rep.* 2016 Jan  
719 20;6:19393.
- 720 17. Ondrejčák T, Klyubin I, Corbett GT, Fraser G, Hong W, Mably AJ, et al. Cellular Prion Protein  
721 Mediates the Disruption of Hippocampal Synaptic Plasticity by Soluble Tau In Vivo. *J*  
722 *Neurosci Off J Soc Neurosci.* 2018 Dec 12;38(50):10595–606.
- 723 18. Hill E, Wall MJ, Moffat KG, Karikari TK. Understanding the Pathophysiological Actions of Tau  
724 Oligomers: A Critical Review of Current Electrophysiological Approaches. *Front Mol Neurosci*  
725 [Internet]. 2020 [cited 2021 Jan 20];13. Available from:  
726 <https://www.frontiersin.org/articles/10.3389/fnmol.2020.00155/full>
- 727 19. Hill E, Gowers R, Richardson MJE, Wall MJ.  $\alpha$ -Synuclein Aggregates Increase the  
728 Conductance of Substantia Nigra Dopamine Neurons, an Effect Partly Reversed by the KATP

- 729 Channel Inhibitor Glibenclamide. *eNeuro* [Internet]. 2021 Jan 1 [cited 2021 Jan 20];8(1).  
730 Available from: <https://www.eneuro.org/content/8/1/ENEURO.0330-20.2020>
- 731 20. Kaufmann TJ, Harrison PM, Richardson MJE, Pinheiro TJT, Wall MJ. Intracellular soluble  $\alpha$ -  
732 synuclein oligomers reduce pyramidal cell excitability. *J Physiol*. 2016 May 15;594(10):2751–  
733 72.
- 734 21. Cicognola C, Brinkmalm G, Wahlgren J, Portelius E, Gobom J, Cullen NC, et al. Novel tau  
735 fragments in cerebrospinal fluid: relation to tangle pathology and cognitive decline in  
736 Alzheimer's disease. *Acta Neuropathol (Berl)*. 2019 Feb;137(2):279–96.
- 737 22. Karikari TK, Nagel DA, Grainger A, Clarke-Bland C, Hill EJ, Moffat KG. Preparation of stable  
738 tau oligomers for cellular and biochemical studies. *Anal Biochem*. 2019 Feb 1;566:67–74.
- 739 23. Karikari TK, Nagel DA, Grainger A, Clarke-Bland C, Crowe J, Hill EJ, et al. Distinct  
740 Conformations, Aggregation and Cellular Internalization of Different Tau Strains. *Front Cell*  
741 *Neurosci* [Internet]. 2019 [cited 2021 Jan 20];13. Available from:  
742 <https://www.frontiersin.org/articles/10.3389/fncel.2019.00296/full>
- 743 24. Lapointe NE, Horowitz PM, Guillozet-Bongaarts AL, Silva A, Andreadis A, Binder LI. Tau 6D  
744 and 6P isoforms inhibit polymerization of full-length tau in vitro. *Biochemistry*. 2009 Dec  
745 29;48(51):12290–7.
- 746 25. Badel L, Lefort S, Berger TK, Petersen CCH, Gerstner W, Richardson MJE. Extracting non-  
747 linear integrate-and-fire models from experimental data using dynamic I–V curves. *Biol*  
748 *Cybern*. 2008 Nov;99(4–5):361–70.
- 749 26. Badel L, Lefort S, Brette R, Petersen CCH, Gerstner W, Richardson MJE. Dynamic I–V  
750 Curves Are Reliable Predictors of Naturalistic Pyramidal-Neuron Voltage Traces. *J*  
751 *Neurophysiol*. 2008 Feb;99(2):656–66.
- 752 27. Harrison PM, Badel L, Wall MJ, Richardson MJE. Experimentally Verified Parameter Sets for  
753 Modelling Heterogeneous Neocortical Pyramidal-Cell Populations. Sporns O, editor. *PLOS*  
754 *Comput Biol*. 2015 Aug 20;11(8):e1004165.
- 755 28. Milesco LS, Bean BP, Smith JC. Isolation of somatic Na<sup>+</sup> currents by selective inactivation of  
756 axonal channels with a voltage prepulse. *J Neurosci Off J Soc Neurosci*. 2010 Jun  
757 2;30(22):7740–8.
- 758 29. Hodgkin AL, Huxley AF. A quantitative description of membrane current and its application to  
759 conduction and excitation in nerve. *J Physiol*. 1952 Aug 28;117(4):500–44.
- 760 30. Braak H, Braak E. Neuropathological staging of Alzheimer-related changes. *Acta*  
761 *Neuropathol (Berl)*. 1991;82(4):239–59.
- 762 31. Zhou L, McInnes J, Wierda K, Holt M, Herrmann AG, Jackson RJ, et al. Tau association with  
763 synaptic vesicles causes presynaptic dysfunction. *Nat Commun*. 2017 May 11;8:15295.
- 764 32. Tamagnini F, Walsh DA, Brown JT, Bondulich MK, Hanger DP, Randall AD. Hippocampal  
765 neurophysiology is modified by a disease-associated C-terminal fragment of tau protein.  
766 *Neurobiol Aging*. 2017 Dec;60:44–56.

- 767 33. Fourcaud-Trocmé N, Hansel D, Vreeswijk C van, Brunel N. How Spike Generation  
768 Mechanisms Determine the Neuronal Response to Fluctuating Inputs. *J Neurosci*. 2003 Dec  
769 17;23(37):11628–40.
- 770 34. Rall W, Segev I. Space-Clamp Problems When Voltage Clamping Branched Neurons With  
771 Intracellular Microelectrodes. In: Smith TG, Lecar H, Redman SJ, Gage PW, editors. *Voltage*  
772 *and Patch Clamping with Microelectrodes* [Internet]. New York, NY: Springer; 1985 [cited  
773 2021 Feb 9]. p. 191–215. Available from: [https://doi.org/10.1007/978-1-4614-7601-6\\_9](https://doi.org/10.1007/978-1-4614-7601-6_9)
- 774 35. Spruston N, Jaffe DB, Williams SH, Johnston D. Voltage- and space-clamp errors associated  
775 with the measurement of electrotonically remote synaptic events. *J Neurophysiol*. 1993 Aug  
776 1;70(2):781–802.
- 777 36. Castelli L, Biella G, Toselli M, Magistretti J. Resurgent Na<sup>+</sup> current in pyramidal neurones of  
778 rat perirhinal cortex: axonal location of channels and contribution to depolarizing drive during  
779 repetitive firing. *J Physiol*. 2007;582(3):1179–93.
- 780 37. Kole MHP, Ilschner SU, Kampa BM, Williams SR, Ruben PC, Stuart GJ. Action potential  
781 generation requires a high sodium channel density in the axon initial segment. *Nat Neurosci*.  
782 2008 Feb;11(2):178–86.
- 783 38. Royeck M, Horstmann M-T, Remy S, Reitze M, Yaari Y, Beck H. Role of Axonal NaV1.6  
784 Sodium Channels in Action Potential Initiation of CA1 Pyramidal Neurons. *J Neurophysiol*.  
785 2008 Oct 1;100(4):2361–80.
- 786 39. Stuart G, Schiller J, Sakmann B. Action potential initiation and propagation in rat neocortical  
787 pyramidal neurons. *J Physiol*. 1997;505(3):617–32.
- 788 40. Puopolo M, Raviola E, Bean BP. Roles of Subthreshold Calcium Current and Sodium Current  
789 in Spontaneous Firing of Mouse Midbrain Dopamine Neurons. *J Neurosci*. 2007 Jan  
790 17;27(3):645–56.
- 791 41. de Lera Ruiz M, Kraus RL. Voltage-Gated Sodium Channels: Structure, Function,  
792 Pharmacology, and Clinical Indications. *J Med Chem*. 2015 Sep 24;58(18):7093–118.
- 793 42. Akin EJ, Solé L, Dib-Hajj SD, Waxman SG, Tamkun MM. Preferential Targeting of Nav1.6  
794 Voltage-Gated Na<sup>+</sup> Channels to the Axon Initial Segment during Development. *PLoS ONE*.  
795 2015 Apr 15;10(4). Available from: <https://www.ncbi.nlm.nih.gov/pmc/articles/PMC4398423/>
- 796 43. Garrido JJ, Giraud P, Carlier E, Fernandes F, Moussif A, Fache M-P, et al. A targeting motif  
797 involved in sodium channel clustering at the axonal initial segment. *Science*. 2003 Jun  
798 27;300(5628):2091–4.
- 799 44. Van Wart A, Trimmer JS, Matthews G. Polarized distribution of ion channels within  
800 microdomains of the axon initial segment. *J Comp Neurol*. 2007 Jan 10;500(2):339–52.
- 801 45. Lorincz A, Nusser Z. Molecular Identity of Dendritic Voltage-Gated Sodium Channels.  
802 *Science*. 2010 May 14;328(5980):906–9.
- 803 46. Catterall WA. Voltage-gated sodium channels at 60: structure, function and pathophysiology.  
804 *J Physiol*. 2012 Jun 1;590(Pt 11):2577–89.
- 805 47. Patino GA, Isom LL. Electrophysiology and beyond: Multiple roles of Na<sup>+</sup> channel  $\beta$  subunits  
806 in development and disease. *Neurosci Lett*. 2010 Dec 10;486(2):53–9.

- 807 48. Kontis KJ, Rounaghi A, Goldin AL. Sodium Channel Activation Gating Is Affected by  
808 Substitutions of Voltage Sensor Positive Charges in All Four Domains. *J Gen Physiol.* 1997  
809 Oct 1;110(4):391–401.
- 810 49. Fozzard HA, Sheets MF, Hanck D. The Sodium Channel as a Target for Local Anesthetic  
811 Drugs. *Front Pharmacol* [Internet]. 2011 [cited 2021 Feb 9];2. Available from:  
812 <https://www.frontiersin.org/articles/10.3389/fphar.2011.00068/full>
- 813 50. Bezanilla F. The Voltage Sensor in Voltage-Dependent Ion Channels. *Physiol Rev.* 2000 Jan  
814 4;80(2):555–92.
- 815 51. Karikari TK, Keeling S, Hill E, Lantero Rodríguez J, Nagel DA, Becker B, et al. Extensive  
816 Plasmid Library to Prepare Tau Protein Variants and Study Their Functional Biochemistry.  
817 *ACS Chem Neurosci.* 2020 Oct 7;11(19):3117–29.
- 818 52. Uhlenbeck GE, Ornstein LS. On the Theory of the Brownian Motion. *Phys Rev.* 1930 Sep  
819 1;36(5):823–41.
- 820 53. Bezanson J, Edelman A, Karpinski S, Shah VB. Julia: A Fresh Approach to Numerical  
821 Computing. *SIAM Rev.* 2017 Jan 1;59(1):65–98.
- 822 54. Rothman K J. No adjustments are needed for multiple comparisons. *Epidemiology.*  
823 1990;1(1):43–6.
- 824 55. Saville D J. Basic statistics and the inconsistency of multiple comparison procedures. *J Exp*  
825 *Psychol Can Psychol Expérimentale.* 2003;57(3):167–75.
- 826 56. Stewart-Oaten A. Rules and Judgments in Statistics: Three Examples. *Ecology.*  
827 1995;76(6):2001–9.  
828  
829  
830  
831

832 **Figure 1: Structure and characterisation of the tau truncations.**

833 **a)** Schematic illustration of the recombinant tau constructs used in this study. Full length (FL) tau  
834 (441) has two N terminal repeat sequences (N1, N2) and four microtubule-binding pseudorepeat  
835 domains (R1–R4). Two truncations were tested. The first, is an N-terminal truncated form of FL tau  
836 (termed C<sup>FRAG</sup>) which consists of amino acids 124-444. The second, is the N-terminal fragment that is  
837 removed by the C<sup>FRAG</sup> truncation (termed N<sup>FRAG</sup>) which consists of amino acids 1-123, including both  
838 of the N-terminal repeat sequences. **b)** All three versions of tau (FL, C<sup>FRAG</sup> and N<sup>FRAG</sup>) were visualised  
839 as monomers, and after undergoing the oligomerisation protocol. Overnight incubation at room  
840 temperature in the absence of any aggregation inducer (*e.g.*, heparin) allowed each protein variant to  
841 form small, soluble tau aggregates, as monitored by negative-stain transmission electron microscopy.  
842 While FL and C<sup>FRAG</sup> both formed granular oligomer-like aggregates, the N-terminal fragment  
843 polymerized into amorphous structures with no consistent shape. Insets: Regions at higher  
844 magnification to illustrate aggregate shape. The monomer preparations did not form any visible  
845 aggregates. Scale bars = 200 nm and insets 20 nm.

846 **Figure 2: The effects of FL-oTau on input resistance and action potential waveform are**  
847 **abolished by N-terminal truncation, although the effects on firing rate remain.**

848 **a)** Standard current–voltage responses for control neurons (grey;  $n=12$  cells, 8 animals) in which  
849 vehicle was injected, for neurons in which FL oTau was introduced (red;  $n=12$  cells, 8 animals) and for  
850 neurons where C<sup>FRAG</sup> oTau (blue;  $n=12$  cells, 7 animals) was introduced. The responses are shown  
851 over the 40-minute recording period. There were no significant changes with control neurons to any of  
852 the measured parameters (0 vs 40 mins, peak input resistance  $p = 0.1455$ , firing rate  $p = 0.1831$ ,  
853 action potential amplitude  $p = 0.0732$  or action potential width  $p = 0.2266$ ). However, there were clear  
854 changes to neuronal properties in the response to FL oTau and C<sup>FRAG</sup> oTau. Panels **b, c, f, g** and **h**  
855 display both average data (mean  $\pm$  SEM) as well as individual data points for each condition over  
856 time. **b)** Graph plotting resting membrane potential against time. There was no change over the  
857 period of recording for any of the three experimental conditions (0 vs 40 mins; vehicle  $p = 0.0898$ , FL  
858 oTau and C<sup>FRAG</sup> oTau,  $p = 0.0898$ ,  $0.0859$  and  $0.0801$  respectively). **c)** Graph plotting input against  
859 time. FL-oTau significantly increased input resistance resistance (at 40 mins, input resistance was  
860 increased to  $130 \pm 6.3$  % of the value at time 0, whole cell breakthrough,  $p = 0.0005$ ) whereas C<sup>FRAG</sup>-  
861 oTau had no effect (at 40 mins, the input resistance was  $100 \pm 2.1$  % of the value at time 0,  $p =$   
862  $0.9263$ ). **d)** Example action potential (AP) waveforms for the three experimental conditions recorded  
863 at time 0 (whole cell breakthrough) and after 40 minutes. Neither vehicle nor C<sup>FRAG</sup>-oTau had any  
864 effect on the action potential waveform. FL oTau reduced the height (amplitude measured at the peak  
865 relative to baseline) and increased the width of the AP. **e)** Example membrane-potential responses to  
866 naturalistic current injection at time 0 (after whole-cell breakthrough) and after 40 min of recording for  
867 each of the three conditions (vehicle, FL-oTau and C<sup>FRAG</sup>-oTau). For FL oTau, there was a reduction  
868 in action potential height coupled with an increase in the firing rate. C<sup>FRAG</sup>-oTau had no effect on  
869 action potential height but did significantly increase the firing rate. Vehicle had no effect. **f)** Graph  
870 plotting normalised firing rate (normalised to time 0) against time. Both FL and C<sup>FRAG</sup> tau oligomers

871 produce a significant increase in firing rate (FL oTau: at 40 mins, the firing rate measured from the  
872 voltage response to naturalistic current injection, was  $171 \pm 19.3$  % of that at time 0,  $p = 0.02$ ; C<sup>FRAG</sup>  
873 oTau: at 40 mins, the firing rate was  $164 \pm 22.5$  % of that at time 0,  $p = 0.0132$ ). No change was  
874 observed with vehicle. **g**) Graph plotting action potential height against time and **(h)** action potential  
875 width against time. A reduction in action potential amplitude and increase in action potential width are  
876 produced by FL oTau (action potential amplitude at 40 minutes significantly ( $p = 0.001$ ) reduced to  $70$   
877  $\pm 7.4$  % of that at time 0 minutes and action potential width at 40 minutes significantly ( $p = 0.0352$ )  
878 increased to  $134 \pm 17.2$  % of that at time 0 minutes) but not by C<sup>FRAG</sup> oTau (action potential amplitude  
879 at 40 minutes  $91 \pm 1.6$  % of that at time 0 minutes,  $p = 0.0791$  or action potential width at 40 minutes  
880  $102 \pm 3.0$  % of that at time 0 minutes  $p = 0.4746$ ). Error bars represent standard error of the mean  
881 (SEM).

882

883 **Figure 3: FL oTau and C<sup>FRAG</sup> oTau reduce the rheobase (minimum current required to fire an**  
884 **action potential).**

885 In the same recordings that are illustrated in Figure 2, the rheobase current (minimal current to evoke  
886 an AP) was determined by injecting a current ramp (-50 pA to 200 pA) and measuring the minimum  
887 current required to fire an action potential. **a**) Example voltage responses to ramp current injections in  
888 control (vehicle) neurons where FL-oTau was injected and neurons where C<sup>FRAG</sup> oTau was  
889 introduced. The voltage responses are shown at zero minutes (whole cell breakthrough) and after 40  
890 minutes of recording (the traces are superimposed). There was no change in control recordings  
891 (vehicle) but there is a clear negative shift (reduction in current required to fire an action potential) for  
892 both tau species. **b**) Graph plotting the mean rheobase current for control (vehicle), FL and C<sup>FRAG</sup> tau  
893 oligomers against time (mean  $\pm$  SEM) and the corresponding individual data points. There was no  
894 significant difference in rheobase in control, FL or C<sup>FRAG</sup> neurons at time 0 (whole-cell breakthrough)  
895 using a Kruskal-Wallis One-Way ANOVA (at 0 mins, the mean rheobase in control was  $61 \pm 3.47$  pA,  
896 with FL the mean rheobase was  $68 \pm 5.39$  pA and with C<sup>FRAG</sup> the mean rheobase was  $79 \pm 7.74$  pA,  $p$   
897  $= 0.1289$ ). In control neurons, there was no significant difference in the rheobase current over the  
898 duration of the recording (at 40 minutes, the rheobase was  $105 \pm 3$  % of the value at time 0 mins,  
899  $p = 0.0830$ , Table 1). However, both FL and C<sup>FRAG</sup> tau oligomers significantly reduced the current  
900 needed to elicit an action potential. For FL oTau, at 40 minutes the rheobase was  $66 \pm 7$  % of the  
901 value at time 0 mins ( $p = 0.0015$ ). When C<sup>FRAG</sup> tau was introduced, at 40 minutes the rheobase was  
902  $70 \pm 5$  % of the value at time 0 mins ( $p = 0.0005$ , Table 1). Error bars represent standard error of the  
903 mean (SEM).

904

905

906

907

908

909

910

**Figure 4: oTau-mediated hyperpolarising shift in spike initiation threshold.**



911 For the dynamic I-V protocol, a naturalistic current is injected into the cell and the recorded voltage is  
912 then used to extract a set of parameters (resting potential  $E$ , time constant  $\tau$ , and spike-threshold  
913 voltage  $V_T$ ; see methods for more details). The second point where the DIV curve crosses 0 mV/ms is  
914 the spike initiation threshold. **a)** Representative examples of dynamic IV curves, for a neuron with the  
915 N-terminal truncation of tau ( $C^{FRAG}$ -oTau) introduced, generated at 0 mins (green) and after 40 mins  
916 (pink). A hyperpolarising shift in spike initiation threshold of 4 mV (more negative) can be observed  
917 (circles on the graph). Panels **b** and **c** display both average data (mean  $\pm$  SEM) as well as individual  
918 data points for each condition over time. **b)** The mean normalised spike threshold data (to value at  
919 time 0) is plotted against time. There was no significant difference between the spike initiation  
920 threshold in control vs  $C^{FRAG}$  neurons at time 0 (whole-cell breakthrough), thus the recordings were  
921 comparable (mean threshold in control neurons was  $-53.82 \pm 1.46$  mV,  $n = 12$  cells, compared to the  
922 mean threshold in  $C^{FRAG}$  neurons which was  $-53.7 \pm 1.64$  mV,  $n = 12$  cells,  $p = 0.5185$ ). In control  
923 neurons, there was no significant difference in spike threshold over the duration of the recording (at  
924 40 minutes, the spike threshold was  $101.3 \pm 1.1$  % of the value at time 0 mins,  $p = 0.4766$ ). Whereas  
925 for neurons where  $C^{FRAG}$  was introduced, the spike initiation threshold was significantly reduced (more  
926 negative) at 40 minutes was compared to 0 minutes (at 40 minutes, the spike threshold was  $94.5 \pm$   
927  $0.9$  % of the value at time 0 mins,  $p = 0.0010$ ). **c)** Graph plotting spike onset against time. There was  
928 no significant difference between the onset in control vs  $C^{FRAG}$  neurons at time 0 (whole-cell  
929 breakthrough), thus the recordings were comparable in quality and stability (mean spike onset in  
930 control neurons was  $1.01 \pm 0.09$  mV,  $n = 12$  cells, compared to the mean threshold in  $C^{FRAG}$  neurons  
931 which was  $0.98 \pm 0.13$  mV,  $n = 12$  cells,  $p = 0.1285$ ). In control neurons, there was no significant  
932 difference in spike onset over the duration of the recording (at 40 minutes, the spike onset was  $103.2$   
933  $\pm 5.7$  % of the value at time 0 mins,  $p = 0.9102$ ). Whereas for neurons where 444 nM aggregated  
934  $C^{FRAG}$  tau was introduced, the onset was increased (steeper, reflecting increased excitability) at 40  
935 minutes was compared to 0 minutes (at 40 minutes, the spike onset was  $140.4 \pm 8.2$  % of the value at  
936 time 0 mins,  $p = 0.0015$ ). The increase in spike onset observed in neurons where  $C^{FRAG}$ -oTau was  
937 introduced reflects faster spike generation after threshold was reached. **d)** Membrane potential  
938 responses to naturalistic current injection for the neuron analysed in **(a)** demonstrates an increase in  
939 firing rate mediated by the introduction of  $C^{FRAG}$  tau oligomers. **e)** Simulated (refractory integrate and  
940 fire model) membrane potential responses produced from the extracted neuronal parameters at time  
941 0 mins (green). The firing rate in the simulational is a good match to what was measured  
942 experimentally. The spike threshold was shifted by  $-4$  mV and the simulation re-run (blue). The  
943 increase in firing rate was comparable to the experimental data at 40 mins **(d)**. The same procedure  
944 was performed, but only with a shift in the spike onset. This had little effect on the firing rate, thus  
945 confirming that the increase in firing rate is predominantly mediated by a shift in spike threshold. Error  
946 bars represent standard error of the mean (SEM).  
947  
948  
949

950 **Figure 5: The rapid increase in input resistance mediated by N<sup>FRAG</sup>-tau (444 nM) is due to**  
951 **aggregation in the soma impeding current flow.**

952 **a)** Representative examples of voltage responses to ramp current injection and voltage responses to  
953 step current injections at 0 mins (whole cell breakthrough) and after 5 mins for neurons with N<sup>FRAG</sup>-tau  
954 (444 nM) injected. N<sup>FRAG</sup>-tau rapidly induces a large increase in input resistance and a reduction in  
955 spike height. At 5 minutes, the input resistance was  $169 \pm 24.2$  % of that at 0 minutes (whole cell  
956 breakthrough), the time constant was reduced to  $77 \pm 3.2$  % of that at 0 minutes and this change in  
957 time constant reflected a change in whole-cell capacitance (by 5 minutes the capacitance was  
958 reduced to  $53 \pm 5.4$  % of that at 0 minutes ( $n = 4$  cells, 4 animals). **b)** Bright-field image of a  
959 hippocampal CA1 pyramidal neuron showing two patch pipettes simultaneously recording from the  
960 soma. In this example pipette 1 was used to inject current and record the voltage response whereas  
961 pipette 2 was used only for recording the voltage responses. **c)** Schematic of the stimulation protocol.  
962 A 200 pA hyperpolarising current step was injected via pipette 1. and the voltage response was  
963 recorded from both pipettes (1. and 2.). **d)** An example experiment where both pipettes contained  
964 vehicle. There was no change in the relative amplitude of the voltage responses between 0 mins  
965 (whole-cell breakthrough) and 5 minutes for pipette 1 and pipette 2 (the relative response was  $97 \pm$   
966  $1.7$  % of the response at 0 minutes,  $p = 0.1484$ ,  $n = 8$  cells, 4 animals). **e)** An example experiment  
967 where 444 nM N<sup>FRAG</sup>-tau was introduced via pipette 1. There is a clear increase in the voltage  
968 response measured in pipette 1 as a result of an increase in input resistance. However, there is no  
969 increase in the voltage response in pipette 2. Thus, the relative ratio of voltage responses between  
970 the two pipettes has fallen, indicative of impeded current flow in the soma. (at 5 minutes the relative  
971 response was  $58.4 \pm 7$  % of the response at 0 minutes,  $p = 0.0078$ ,  $n = 8$  cells, 4 animals). **f)** Graph  
972 plotting the mean normalised ratio of voltage responses (pipette 2/ pipette 1) for recordings where  
973 both pipettes contained vehicle (control,  $n = 8$  cells) and when pipette 1 contained 444 nM N<sup>FRAG</sup>-tau  
974 ( $n = 8$  cells). There is a significant reduction in the ratio of voltage responses when 444 nM N<sup>FRAG</sup>-tau  
975 is injected, suggesting that less current reaches pipette 2. Error bars represent standard error of the  
976 mean (SEM).

977

978 **Figure 6: The effects of FL-oTau on action-potential waveform are reproduced by lower**  
979 **concentrations of N<sup>FRAG</sup>-tau aggregates and monomers.**

980 Panels **a**, **b**, **c**, **d**, **f** and **g** display both average data (mean  $\pm$  SEM) as well as individual data points  
981 for each condition over time. **a)** Graph showing that there is no change to the resting membrane  
982 potential over the period of recording for any of the conditions (133 nM N<sup>FRAG</sup>-tau monomers or  
983 aggregates; N<sup>FRAG</sup> tau aggregates: at 40 mins, the resting membrane potential was  $99 \pm 1.0$  % of that  
984 at time 0,  $p = 0.9609$ ,  $n = 12$  cells, 7 animals; N<sup>FRAG</sup> tau monomers at 40 mins, the resting membrane  
985 potential was  $104 \pm 2.4$  % of that at time 0,  $p = 0.0938$ ,  $n=12$  cells, 6 animals. **b)** Graph showing that  
986 there is no change to the input resistance over the period of recording for 133 nM N<sup>FRAG</sup>-tau  
987 aggregates or monomers (N<sup>FRAG</sup> tau aggregates: at 40 mins, the peak input resistance, measured  
988 from the voltage response to step current injection, was  $102 \pm 7.7$  % of that at time 0,  $p = 0.9531$ ;

989  $N^{\text{FRAG}}$  tau monomers: at 40 mins, the peak input resistance, measured from the voltage response to  
990 step current injection, was  $102 \pm 4.1$  % of that at time 0,  $p = 0.9395$ . **c)** Graph showing that there is no  
991 change to the firing rate over the period of recording for 133 nM  $N^{\text{FRAG}}$  aggregates or monomers  
992 ( $N^{\text{FRAG}}$  tau aggregates: at 40 mins, the firing rate, measured from the voltage response to naturalistic  
993 current injection, was  $107 \pm 13.6$  % of that at time 0,  $p = 0.7471$ ;  $N^{\text{FRAG}}$  tau monomers: at 40 mins, the  
994 firing rate, measured from the voltage response to naturalistic current injection, was  $106 \pm 10.5$  % of  
995 that at time 0,  $p = 0.5068$ ). **d)** Graph showing that there is no change to the rheobase current (minimal  
996 current to evoke an AP) over the period of recording for 133 nM  $N^{\text{FRAG}}$ -tau aggregates or monomers  
997 ( $N^{\text{FRAG}}$  tau aggregates: at 40 mins, the rheobase was  $127 \pm 11.9$  % of that at time 0,  $p = 0.1294$ ;  
998  $N^{\text{FRAG}}$  tau monomers: at 40 mins, the rheobase was  $116 \pm 10.1$  % of that at time 0,  $p = 0.2402$ ). **e)**  
999 Representative examples of average action potential waveforms from neurons with either 444 nM FL-  
1000 oTau, 133 nM  $N^{\text{FRAG}}$ -tau aggregates or 133 nM  $N^{\text{FRAG}}$ -tau monomers introduced. In all 3 conditions  
1001 there is a comparable decrease in action potential height and increase in action potential width. **f)**  
1002 Graph plotting mean normalised action potential height (at time 0) against time. There is a  
1003 comparable decrease in action potential height for 133 nM  $N^{\text{FRAG}}$ -tau aggregates, monomers and FL-  
1004 oTau ( $N^{\text{FRAG}}$  tau aggregates: action potential amplitude at 40 minutes was significantly reduced to  $76$   
1005  $\pm 2.9$  % of that at time 0 minutes,  $p=0.0005$ ;  $N^{\text{FRAG}}$  tau monomers: action potential amplitude at 40  
1006 minutes was significantly reduced to  $82 \pm 2.6$  % of that at time 0 minutes,  $p=0.0010$ ). **g)** Graph  
1007 plotting mean normalised action potential width (at time 0) against time. There is a comparable  
1008 increase in action potential width over the period of recording for 133 nM  $N^{\text{FRAG}}$ -tau aggregates,  
1009 monomers and FL-oTau ( $N^{\text{FRAG}}$  tau aggregates: action potential width at 40 minutes was significantly  
1010 increased to  $118 \pm 7.4$  % of that at time 0 minutes,  $p = 0.0186$ ;  $N^{\text{FRAG}}$  tau 32 monomers: action  
1011 potential width at 40 minutes was significantly increased to  $123 \pm 2.0$  % of that at time 0 minutes,  $p =$   
1012  $0.0303$ ). Pale red lines demonstrate the effects of FL-oTau for comparison (data presented in figure  
1013 2). Action potential (AP), Firing rate (FR), Input resistance (Rin), Resting membrane potential (resting  
1014 membrane potential). Error bars represent standard error of the mean (SEM).

1015

1016 **Figure 7: FL tau oligomers directly modify somatic sodium channel currents recorded from**  
1017 **hippocampal CA1 neurons in acute slices. a)** Example of the recording protocol (adapted from 27).  
1018 A pre-pulse step of 5 ms from (-80 mV to -40 mV) elicits a current response from axonal (but not  
1019 somatic) sodium channels. There is a brief step to -55 mV (1 ms) before the steps that are used to  
1020 evoke the controlled sodium channel currents (15 ms in duration). The steps were given consecutively  
1021 from -60 V to + 60 mV (5 mV increment) with a 2 s gap between each sweep. Leak currents were  
1022 subtracted with the P/N protocol (1/4) and the junction potential (+ 8 mV) was corrected for. **b)** In  
1023 order to look at the full range of of the changes that had been observed with the different truncations,  
1024 FL-oTau (444 nM) was used in these experiments and compared against control. Conductance was  
1025 calculated using the following equation: conductance ( $g$ ) = *current (I)* / (*Vstep -Vreversal*). The  
1026 conductance in response to steps up to 0 mV is plotted as a mean (and SEM) for all control cells  
1027 (vehicle,  $n=7$  cells, 6 animals). **c)** The conductance in response to steps up to 0 mV is plotted as a  
1028 mean (and SEM) for all cell where FL-oTau (444 nM) was introduced ( $n = 7$  cells, 5 animals) is

1029 plotted. For B and C, the grey line is 0 mins and the red 20 mins. A Boltzmann fit allows half activation  
1030 voltage and the time constant (measure of the speed of activation). **d)** Mean change in half activation  
1031 from 0 mins to 20 mins for control and FL-oTau injected neurons. Data is given relative to the value at  
1032 time 0. Mean and SEM are shown, and individual data points are overlaid on top. While control  
1033 (vehicle) cells are stable over time (at 20 mins, the half activation was  $98 \pm 1.0$  % of that at time 0,  $p =$   
1034  $0.2031$ ), FL-oTau introduced cells show a significant decrease in half activation (activate at lower  
1035 voltages; increase in excitability; at 20 minutes, the half activation was  $150 \pm 11.7$  % of that at time 0,  
1036  $p = 0.0078$ ), but they also show a doubling of the activation constant (**e**; in control cells, at 20 mins, it  
1037 was  $101 \pm 3.6$  % of that at time 0,  $p = 0.9375$ , whereas in FL-oTau introduced neurons had increased  
1038 significantly to  $171 \pm 15.4$  % of that at time 0,  $p = 0.0078$ ), fitting with the slower rise time of APs  
1039 observed in (11). **f, g)** Example sodium currents from neurons with vehicle introduced (control) and  
1040 FL-oTau introduced at 0 mins and after 20 mins demonstrating the reduction in peak current induced  
1041 by FL-oTau, with no change introduced in control. **h, i)** Raw conductance data (averaged) to highlight  
1042 the reduction in maximal conductance for FL-oTau after 20 mins. Inset demonstrates the crossover at  
1043 low voltages, where FL- oTau at 20 mins produces a higher conductance, despite the maximal  
1044 conductance being reduced at higher voltages. **j)** A simple Hodgkin Huxley model of action-potential  
1045 dynamics was used to predict the effect of reducing the maximal sodium channel conductance on the  
1046 action potential waveform. Reducing the maximal sodium channel conductance by two thirds, as  
1047 measured experimentally in (**i**) produced similar changes in the action potential waveform (**j**) to that  
1048 observed experimentally with FL-oTau (**k**). Error bars represent standard error of the mean (SEM).

| Parameter             | Vehicle/ control (n = 12) |        |         |        | Full length tau (n = 12) |        |         |        | C <sup>FRAG</sup> (n = 12) |        |         |        |
|-----------------------|---------------------------|--------|---------|--------|--------------------------|--------|---------|--------|----------------------------|--------|---------|--------|
|                       | 0 mins                    |        | 40 mins |        | 0 mins                   |        | 40 mins |        | 0 mins                     |        | 40 mins |        |
|                       | Mean                      | SEM    | Mean    | SEM    | Mean                     | SEM    | Mean    | SD     | Mean                       | SEM    | Mean    | SEM    |
| RMP (mV)              | -64                       | ± 1.07 | -66     | ± 1.36 | -66                      | ± 0.75 | -64     | ± 1.30 | -64                        | ± 0.92 | -67     | ± 1.52 |
| Input Resistance (MΩ) | 204                       | ± 18.6 | 197     | ± 20.1 | 165                      | ± 6.29 | 218     | ± 16.1 | 178                        | ± 13.4 | 177     | ± 11.7 |
| Firing Rate (Hz)      | 1.73                      | ± 0.4  | 1.63    | ± 0.45 | 1.25                     | ± 0.3  | 1.73    | ± 0.3  | 1.1                        | ± 0.19 | 1.5     | ± 0.21 |
| AP Height (mV)        | 85                        | ± 2.52 | 83      | ± 2.86 | 87                       | ± 3.42 | 63      | ± 7.48 | 89                         | ± 2.19 | 86      | ± 2.45 |
| AP width (ms)         | 1.8                       | ± 0.09 | 1.7     | ± 0.08 | 1.8                      | ± 0.05 | 2.4     | ± 0.34 | 1.8                        | ± 0.06 | 1.9     | ± 0.06 |
| Rheobase (pA)         | 61                        | ± 3.47 | 60      | ± 4.51 | 68                       | ± 5.39 | 47      | ± 7.42 | 79                         | ± 7.74 | 56      | ± 8.18 |

1049

1050 **Table 1: Electrophysiological parameters measured for CA1 neurons with either vehicle, C<sup>FRAG</sup> or N<sup>FRAG</sup> introduced.** Recordings were made from  
 1051 hippocampal CA1 neurons. There was no significant difference between any of the measured parameters at 0 minutes (whole-cell breakthrough), using  
 1052 Kruskal Wallis ANOVAs (see text for p values). Comparisons were then made between 0 and 40 minutes for each of the conditions using non-parametric  
 1053 Wilcoxon-signed rank tests (see text for p values). Data shown as mean and SEM. Action potential (AP), Firing rate (FR), Input resistance (IR), Resting  
 1054 membrane potential (RMP).

1055  
1056

| Parameters       | FL-oTau (444 nM) | C <sup>FRAG</sup> -oTau (444 nM) | N <sup>FRAG</sup> -oTau (444 nM) | N <sup>FRAG</sup> -oTau (133 nM) | N <sup>FRAG</sup> -Tau (133 nM) | Potential mechanism                                                                                                             |
|------------------|------------------|----------------------------------|----------------------------------|----------------------------------|---------------------------------|---------------------------------------------------------------------------------------------------------------------------------|
| AP height        | ↓                | -                                | ↓                                | ↓                                | ↓                               | Slower activation of voltage-gated sodium channels                                                                              |
| AP width         | ↑                | -                                | ↑                                | ↑                                | ↑                               |                                                                                                                                 |
| Input resistance | ↑                | -                                | ↑                                | -                                | -                               | Aggregation in the soma impeding current flow, artificially altering capacitance.                                               |
| Firing rate      | ↑                | ↑                                | -                                | -                                | -                               | Shift in spike initiation threshold (more hyperpolarised).<br><br>Shift in the half activation of voltage-gated sodium channels |
| Rheobase         | ↓                | ↓                                | -                                | -                                | -                               |                                                                                                                                 |

1057  
1058  
1059  
1060  
1061  
1062  
1063  
1064  
1065  
1066  
1067  
1068  
1069  
1070  
1071  
1072  
1073  
1074

**Table 2: Summary of findings using recombinant truncations of tau and the identified mechanisms.**

**a** Full length tau (FL)

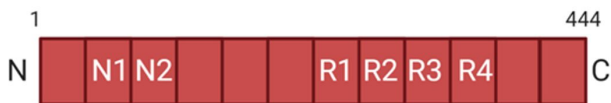

N-terminal fragment ( $N^{\text{FRAG}}$ )

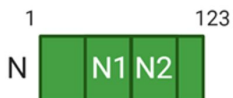

C-terminal fragment ( $C^{\text{FRAG}}$ )

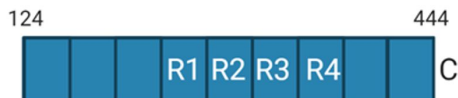

**b**

FL

$C^{\text{FRAG}}$

$N^{\text{FRAG}}$

Oligomers

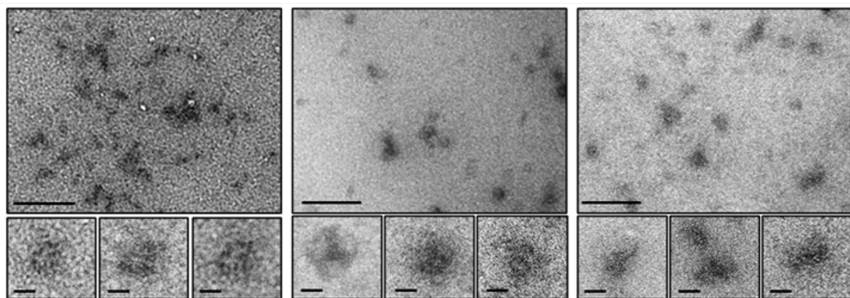

Monomers

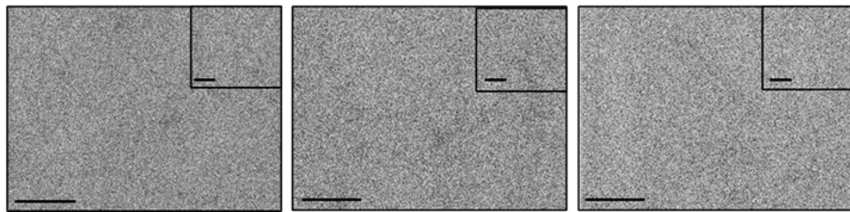

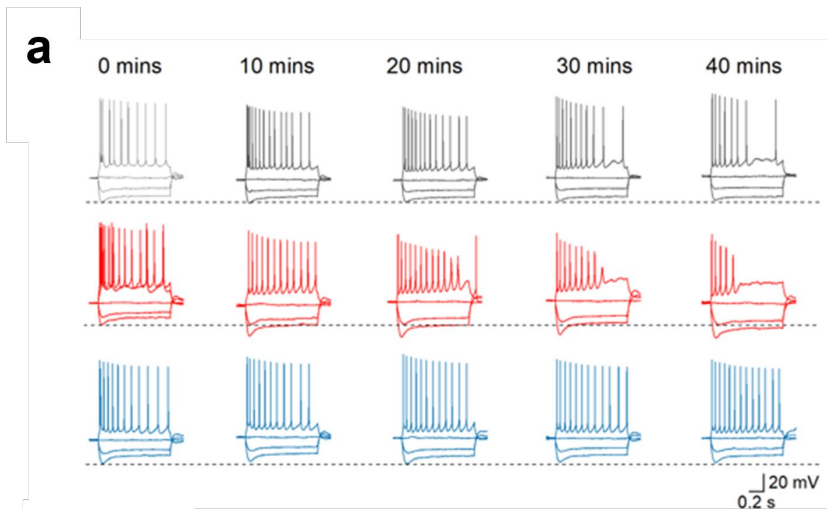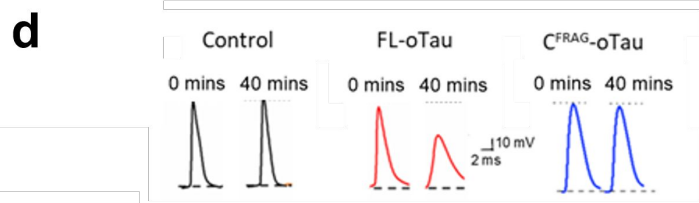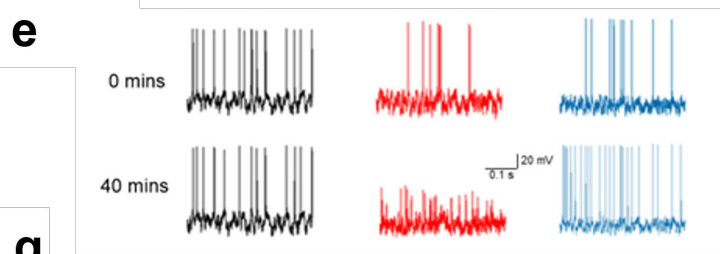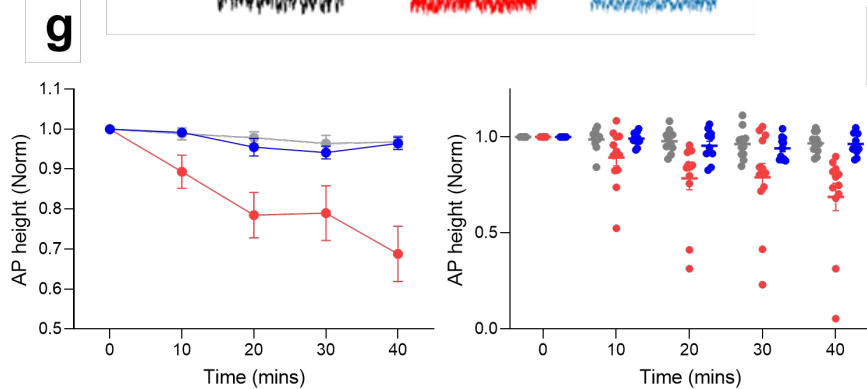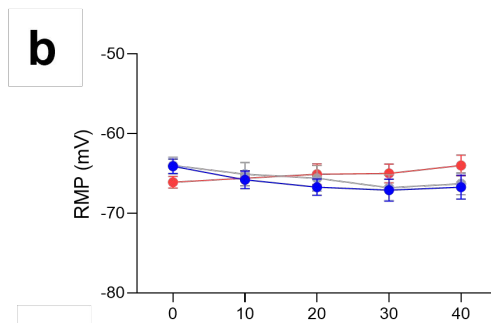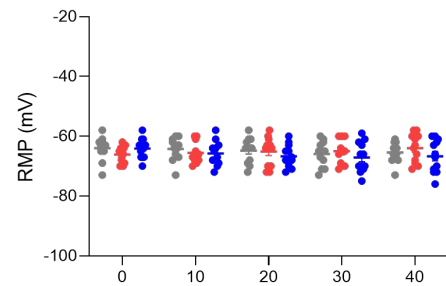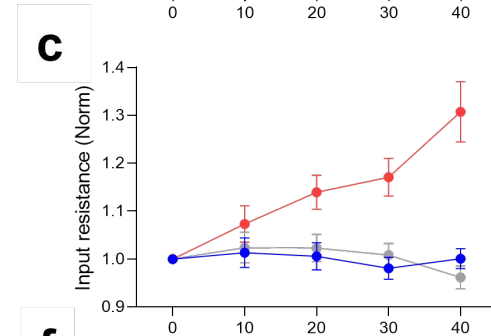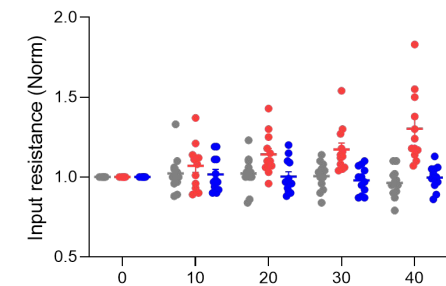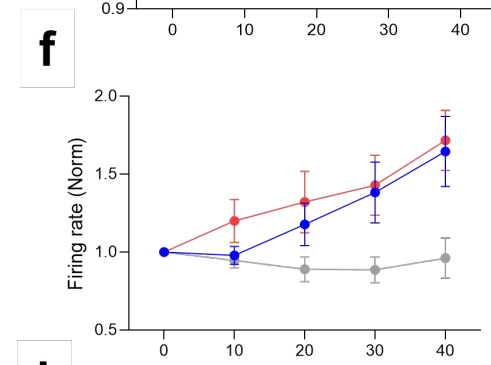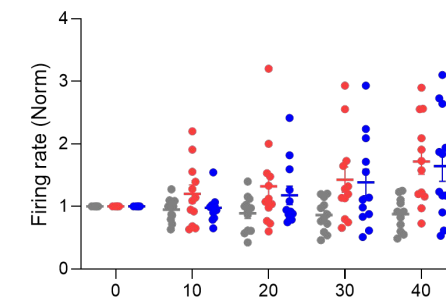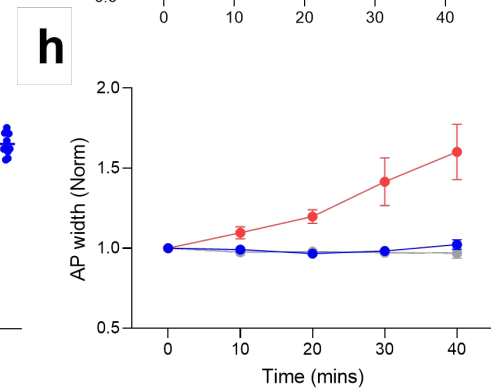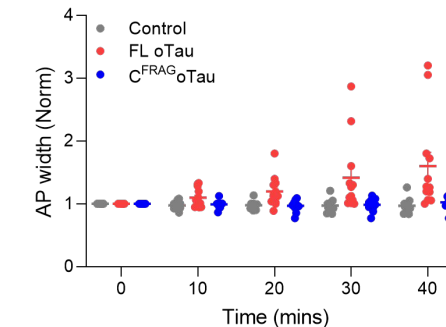



**a**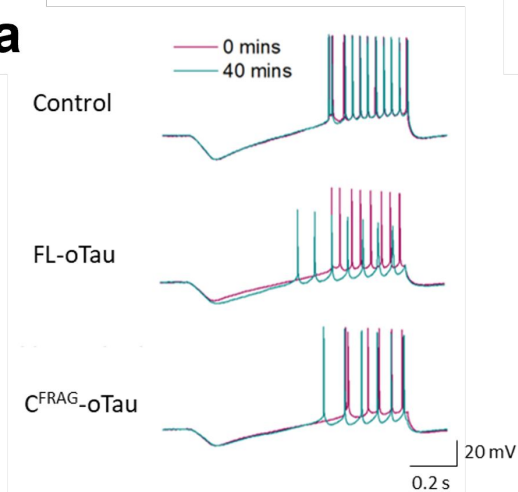**b**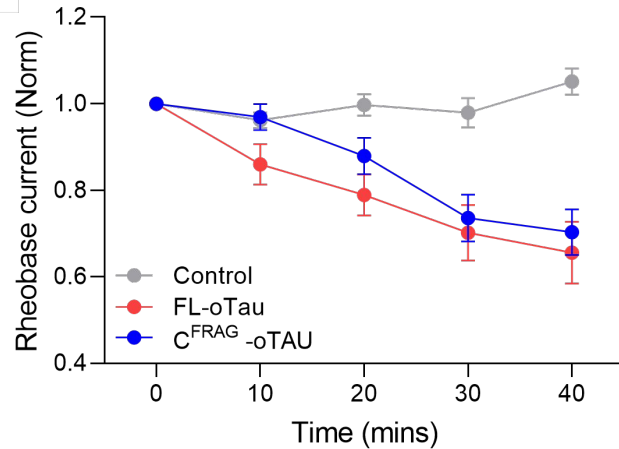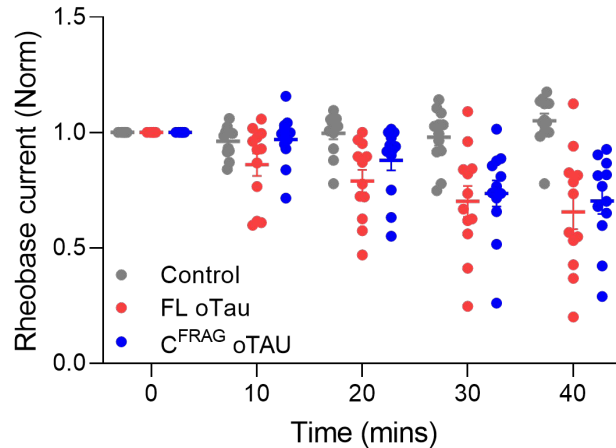

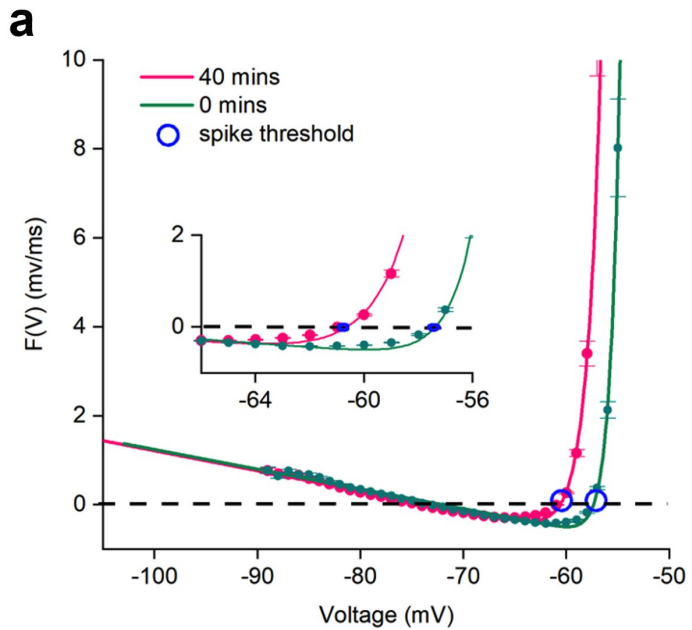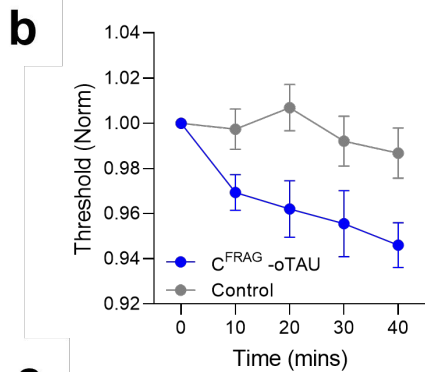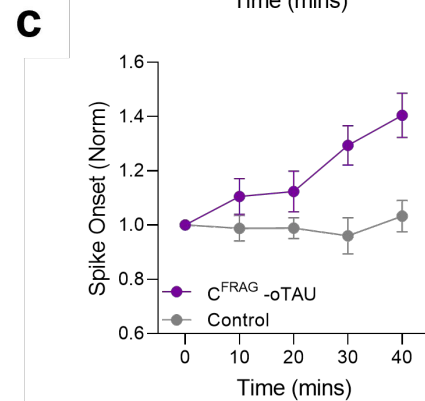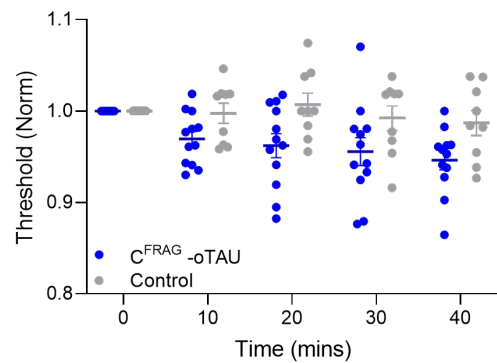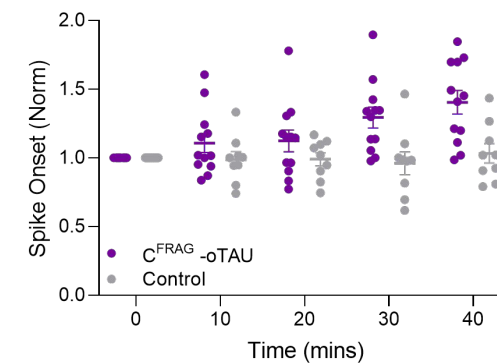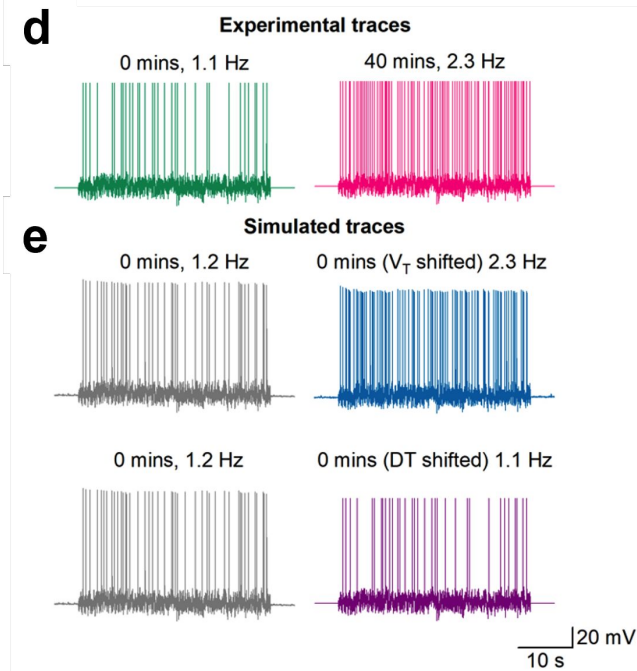

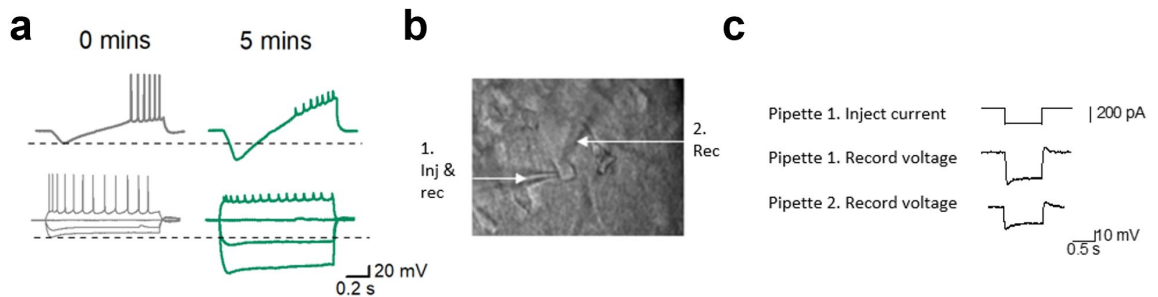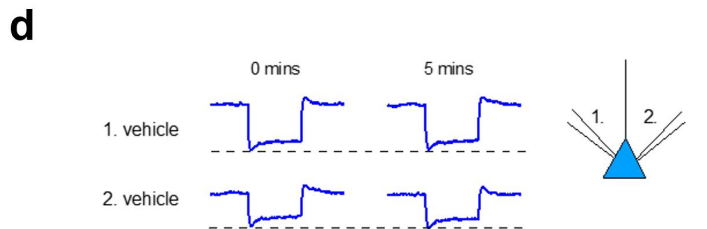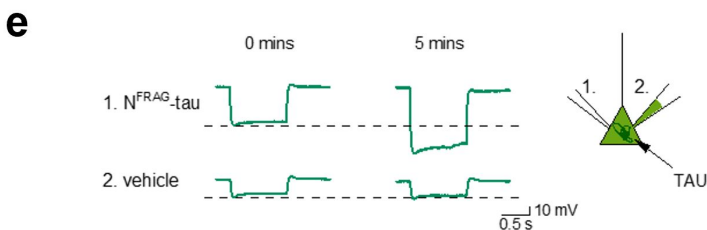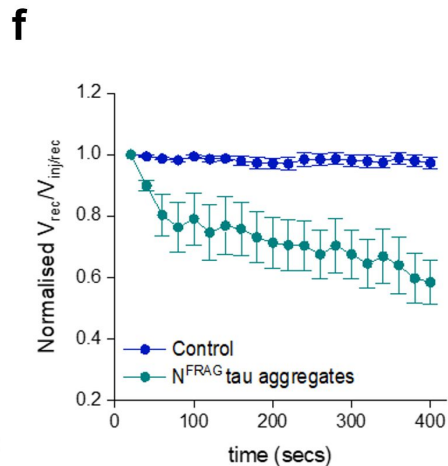

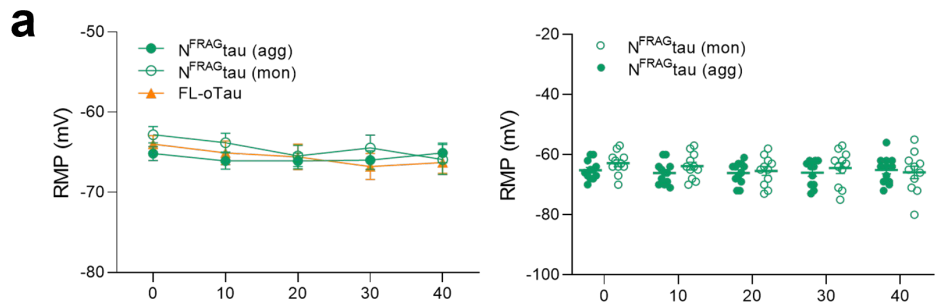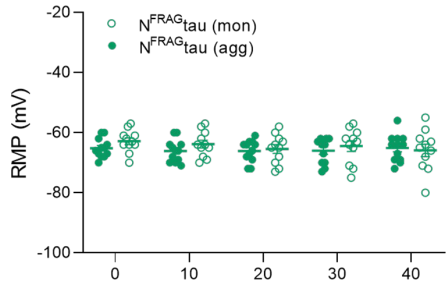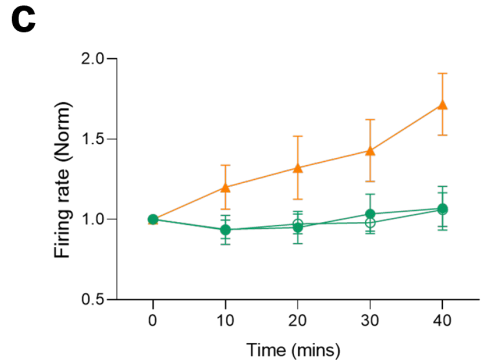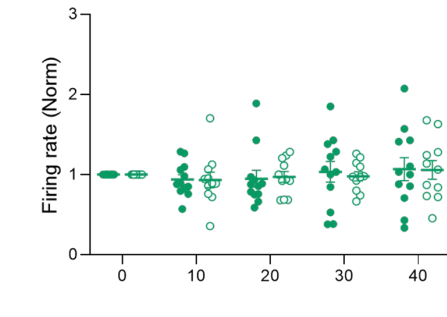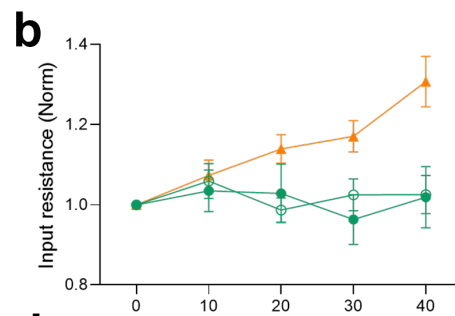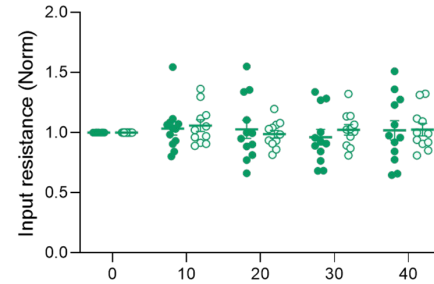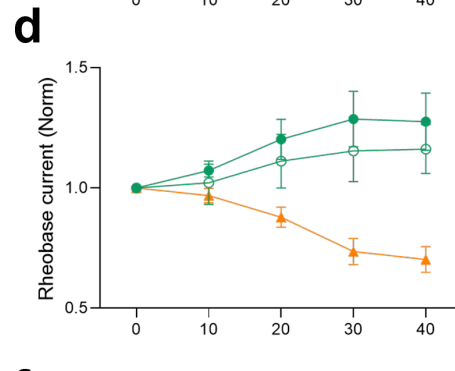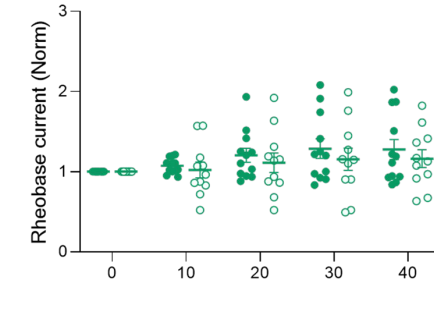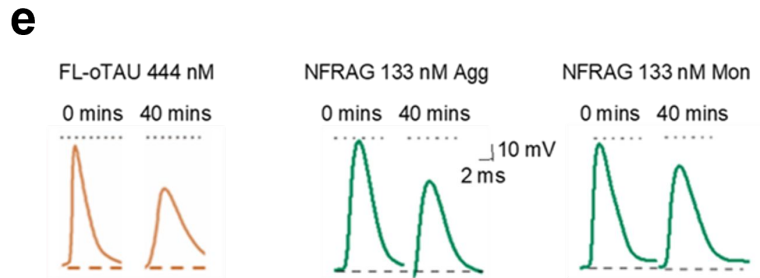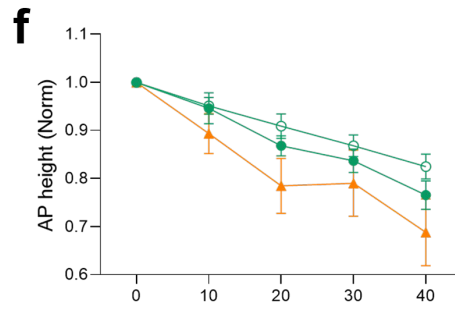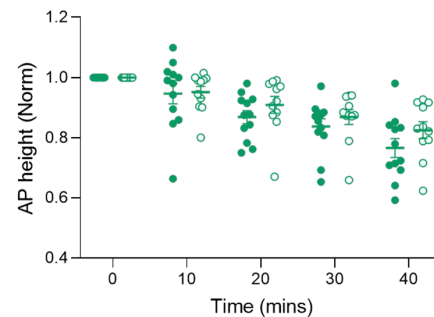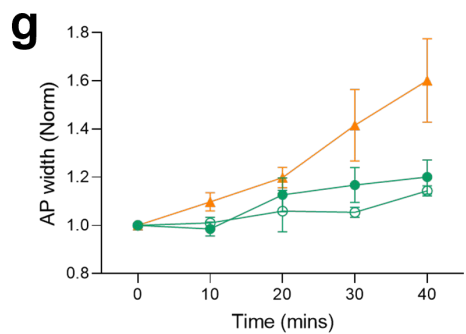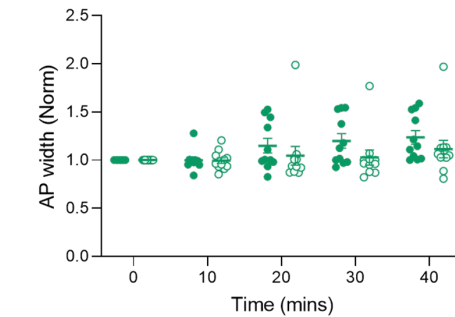

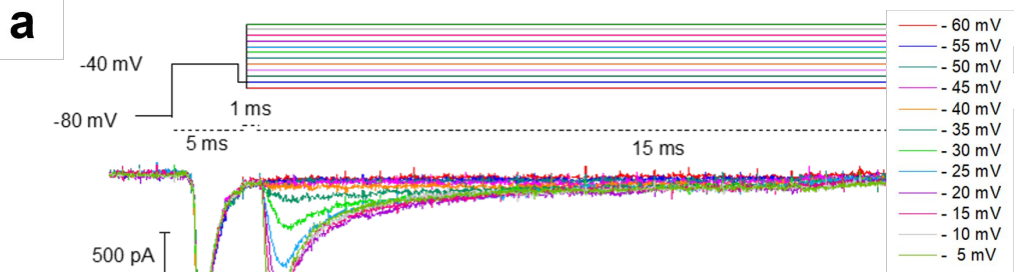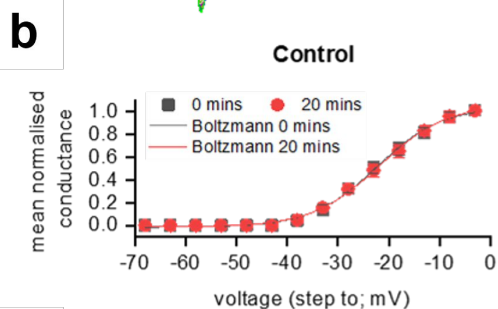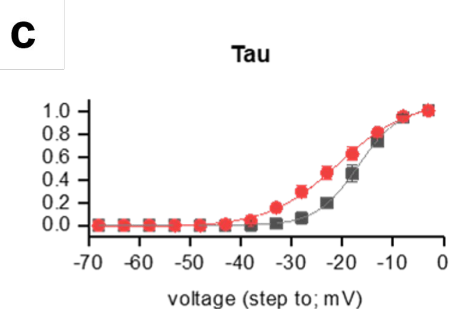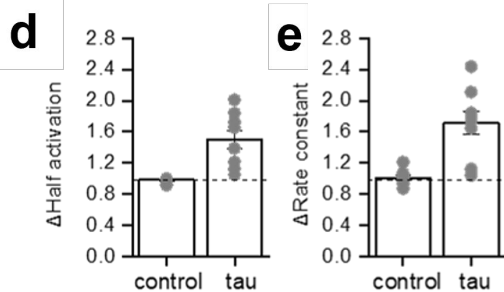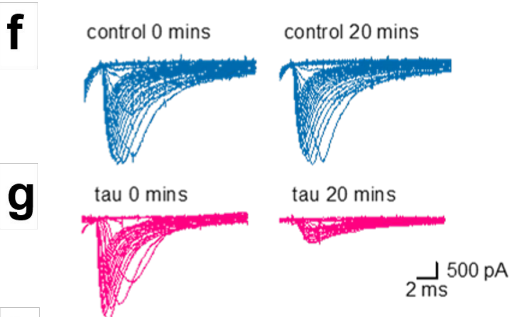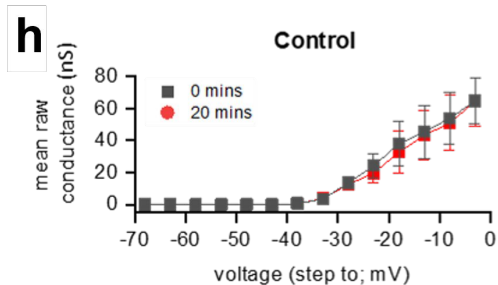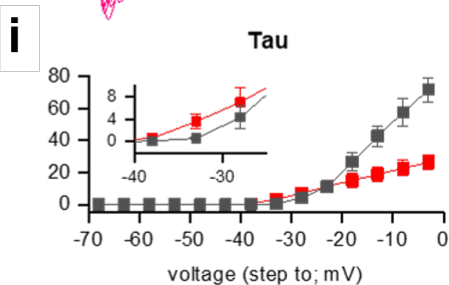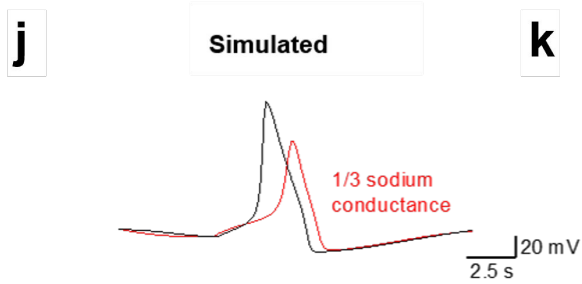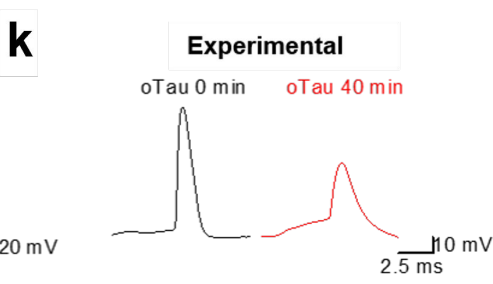

Source: https://www.biorxiv.org/content/10.1101/2021.05.13.443904v2.full.pdf
